# How do individuals cope with stress? Behavioural, physiological and neuronal differences between proactive and reactive coping styles in fish

Marco A. Vindas<sup>1, 2\*</sup>, Marnix Gorissen<sup>3</sup>, Erik Höglund<sup>4</sup>, Gert Flik<sup>3</sup>, Valentina Tronci<sup>1</sup>, Børge Damsgård<sup>5, 6</sup>, Per-Ove Thörnqvist<sup>7</sup>, Tom O. Nilsen<sup>1</sup>, Svante Winberg<sup>7</sup>, Øyvind Øverli<sup>8</sup>, Lars O.E. Ebbesson<sup>1</sup>

<sup>1</sup> Uni Environment, Uni Research AS, NO-5020 Bergen, Norway

<sup>2</sup> Department of Biosciences, University of Oslo, NO-0316 Oslo, Norway

<sup>3</sup> Radboud University, Institute for Water and Wetland Research, Department of Animal Ecology & Physiology, 6525 AJ Nijmegen, The Netherlands

<sup>4</sup> National Institute of Aquatic Resources, Technical University of Denmark, DK-9850 Hirtshals, Denmark

<sup>5</sup> The University Centre of Svalbard, NO-9171 Longyearbyen, Norway

<sup>6</sup> Nofima, NO-9291 Tromsø, Norway

<sup>7</sup> Department of Neuroscience, Uppsala University, SE-75124 Uppsala, Sweden

<sup>8</sup> Department of Food Safety and Infection Biology, Norwegian University of Life Sciences, NO-0033 Oslo, Norway

## Abstract

Despite the use of fish models to study human mental disorders and dysfunctions, knowledge of regional telencephalic responses in non-mammalian vertebrates expressing alternate stress coping styles is poor. Since perception of salient stimuli associated with stress coping in mammals is mainly under forebrain limbic control, we tested region-specific forebrain neural (*i.e.* mRNA abundance and monoamine neurochemistry) and endocrine responses at basal and acute stress conditions for previously characterised proactive and reactive Atlantic salmon. Reactive fish show a higher degree of the neurogenesis marker proliferating cell nuclear antigen (*pcna*) and dopamine activity under basal conditions in DI (proposed hippocampus homologue) and higher post-stress plasma cortisol levels. Proactive fish displayed post-stress higher serotonergic signalling (*i.e.* higher serotonergic activity and expression of the 5-HT<sub>1A</sub> receptor abundance) in the proposed amygdala homologue (Dm), increased expression of the neuroplasticity marker brain derived neurotropic factor (*bdnf*) in both DI and Vv (lateral septum homologue), as well as increased expression of the corticotropin releasing factor 1 (*crf1*) receptor in the DI, in line with active coping neuro-profiles reported in the mammalian literature. We present novel evidence of proposed functional equivalences in the fish forebrain with mammalian limbic structures.

**Keywords:** Atlantic salmon, limbic areas, neural plasticity, BDNF, serotonin

\* Corresponding author. Tel: +4792864946. E-mail: marco.vindas@uni.no

## Introduction

Many studies reported consistent and correlated behavioural and physiological traits in vertebrates, including the correlation between dominant behaviour and lower stress reactivity. Notably, individuals perceive and react differently to their environment, and this affects their robustness to challenges such as stress and diseases (Dingemanse et al., 2010; Koolhaas, 2008; Koolhaas et al., 1999; Seiffge-Krenke, 2011; Øverli et al., 2007). In this context, animals have to balance attention, inhibition of active behaviour and cognitive flexibility in relation to internal and external feedback in an ever-changing environment (Bari and Robbins, 2013). Coping styles have been defined as “*a set of individual behavioural and physiological responses to stress which are consistent over time*”, and are commonly used to study individual variations in the stress response of vertebrates, including fish (Koolhaas, 2008; Koolhaas et al., 2007; Øverli et al., 2007). Behaviourally, proactive animals tend to be bolder, more aggressive, dominant and less flexible to changes in routines. Physiologically, proactive individuals are characterised by lower hypothalamic-pituitary-adrenal axis reactivity (*i.e.* lower post-stress cortisol), as well as lower brain serotonergic and higher dopaminergic activity, while reactive individuals exhibit an opposite behavioural and physiological profile (Koolhaas et al., 2007; Koolhaas et al., 2010; Koolhaas et al., 1999). Notably, while differences between coping styles in behaviour, hypothalamic-pituitary-interrenal (HPI) axis reactivity (the fish’s HPA equivalent) and monoaminergic activity in multifunctional brain regions, such as the telencephalon, hypothalamus and the brain stem, have been reported in fish (Johansen et al., 2012; Schjolden et al., 2006; Silva et al., 2014; Øverli et al., 2001; Øverli et al., 2007), a more precise, region-specific, characterisation of telencephalic areas is still lacking. Region-specific studies of functional subdivisions and limbic nuclei are notoriously difficult in fish, as a result of their relatively small size. Yet, by characterisation of conserved neural circuits that regulate adaptive behavioural responses, a neural basis for individual variation can be discerned in teleosts (Maruska et al., 2013). As fish models are becoming increasingly popular to study central nervous systems diseases (Panula et al., 2006), comprehensive, functional and regional neural studies are needed to allow extrapolation of obtained results to mammalian models.

In contrast to mammals, the fish’s telencephalon lacks a 6-layered pallium. Instead, teleostean telencephalic pallial areas contain aggregates of neurons (Ito and Yamamoto, 2009), similar to birds (Karten, 1991; Shimizu, 2007). Interestingly, a lack of a 6-layered pallium does not imply an absence of so-called “higher functions”, and telencephalic cortical-like functions have been reported in several fish species indeed (Bshary and Brown, 2014; Demski, 1983; Grosenick et al., 2007; Ito et al., 2007; Ocaña et al., 2015). The fish’s dorsomedial (Dm) and dorsolateral (Dl) pallium have been characterised as functional homologues to the mammalian amygdala and hippocampus, respectively, and are implicated in stimuli salience, memory and learning (Goodson and Kingsbury, 2013; O’Connell and Hofmann, 2011; Vargas et al., 2009). Furthermore, in terms of stimuli salience and emotional coding, the mammalian lateral septum appears to work in conjunction with the amygdala and hippocampus to regulate emotional reactivity and goal-oriented behaviour, respectively (Luo et al., 2011; Singewald et al., 2011). The ventral part of the ventral telencephalon (Vv) in fish has been proposed as putative homologue to the mammalian lateral septum (Goodson and Kingsbury, 2013; O’Connell and Hofmann, 2011).

By use of a behavioural paradigm, we characterised contrasting stress coping styles in a individually tagged domestic population of Atlantic salmon (*Salmo salar* L.). That is, fish that escaped an imposed hypoxia by swimming into an adjacent normoxic tank and fish that did not, were characterised as proactive and reactive coping styles, respectively. Following a resting period in their home tanks after coping style selection, target regions in the telencephalon were micro dissected to determine differences in monoamine neurochemistry and gene expression of serotonergic and *corticotropin releasing factor (crf)* systems (both important systems in the regulation of the HPI axis), as well as neural plasticity and proliferation genes, both in control conditions and following an acute stressor. Plasma cortisol levels were assessed as a direct indicator of HPI axis activity, which also gives physiological support to the assessment of proactive and reactive behavioural patterns. *In situ* hybridisation (ISH) analysis was conducted post-stress in order to visualise and identify activated telencephalic areas. We hypothesise that region-specific differences in monoamine neurochemistry and transcript abundance profiles within the telencephalon of proactive and reactive fish will be comparable to those reported for contrasting coping styles in mammals (Koolhaas et al., 2010; Veenema and Neumann, 2007) and believe that our results are important for understanding the association between individual behavioural differences and regulatory monoaminergic and neural plasticity substrates.

## Materials and Methods

### Statement on ethics

This work was approved by the Norwegian Animal Research Authority (NARA), following the Norwegian laws and regulations with respect to experiments and procedures on live animals in Norway.

### Animals, facilities and hypoxia-response sorting

The study was conducted at the Aquaculture Research Station in Tromsø (Norway), using 0+ Atlantic salmon (Atlantic QTL-innova IPN). The fish were reared at 10°C, continuous light regime and feeding *ad libitum* (Skretting Nutra). The fish were individually tagged using internal 12 mm PIT-Tags (HPT12 tags in pre-loaded tray, Biomark, Boise, US), injected with an MK-25 implant gun. The fish population ( $n = 480$ , divided over 8 groups) was reared in circular holding tanks (~ 116 L) with flow-through freshwater. Mean body mass two weeks prior to the experiment was  $57.1 \pm 7.3$  g. The experimental setup for the hypoxia sorting consisted of two custom-made circular tanks (~ 200 L, diameter 65 cm, water depth 60 cm, Cipax AS, Bjørkelangen, Norway), *i.e.* one low oxygen/hypoxia and one normal oxygen/normoxia tanks. The tanks were connected at the surface level by a tube (inner diameter 9 cm). This tube was integrated with a custom-made spool PIT-Tag antenna (Biomark Ltd, Boise, US), which was linked to a Biomark FS2001 reader and tag manager software. In this way, we were able to identify fish leaving into the normoxia tank (*i.e.* proactive) and those staying (*i.e.* reactive) independent of the declining oxygen level. Each tank had a separate water in- and outlet. In the hypoxia tank, the inlet was connected to a N<sub>2</sub> gas exchanger (15 mg N<sub>2</sub> L<sup>-1</sup>), which deoxygenated the inflowing water. Oxygen levels (mg O<sub>2</sub> L<sup>-1</sup>) in the tanks were monitored every min, using an O<sub>2</sub>-monitoring system (Loligo Systems, Tjele, Denmark). Control tests, prior to the experiment, demonstrated that the oxygen depletion in the hypoxia tank was homogenous throughout the water column. Two video cameras were mounted on top of the tanks to observe the fish passing the tube between

the tanks. Each test took approximately five hours and started at 08:30 h. All tests were conducted in an equal manner. Prior to the test, the tanks were cleaned, water temperature regulated if necessary, and the water flow in each tank set to  $3.5 \text{ L min}^{-1}$ . The fish were transferred from their holding tanks to the hypoxia tank as carefully as possible and left undisturbed (behind an opaque curtain) for the duration of the test. The fish were allowed to acclimatise in the system for two hours prior to the drop in oxygen levels. During the decline in oxygen, water flow in the hypoxia tank was directed through the  $\text{N}_2$  gas exchanger, and a sliding door between the hypoxia and normoxia tank was opened, allowing fish to swim freely between the tanks. The experiment was terminated when oxygen levels reached 25% saturation in hypoxic tank, after which all fish were transferred back to their holding tanks. This test was conducted twice to assure consistency of the behavioural response.

### Sampling protocol

After the sorting experiment, fish were left undisturbed in their holding tanks for a period of two-and-a-half months, after which they were sampled at basal and acute stress conditions. Reactive and proactive fish were sampled either straight from holding tanks ( $n = 22$ ; 10 reactive, 12 proactive) or after lowering the water level to 5 cm for 30 min (acute stress test;  $n = 28$ ; 17 reactive, 11 proactive). Both proactive and reactive fish were collected simultaneously by netting them directly from their holding tanks (each tank contained mixed proactive and reactive fish). Immediately after netting, individuals were euthanised with an overdose of  $1 \text{ g L}^{-1}$  MS-222 (Finquel®, Argent Chemical Laboratories, Redmond, WA, USA) buffered with  $25 \text{ mg L}^{-1}$   $\text{NaHCO}_3$ , which rendered them completely motionless (no opercular movement) within 10 s of immersion. Fish were rapidly weighed, fork length measured and a blood sample was taken from the caudal vessels with a 1-ml syringe fitted with a 23G needle containing the anticoagulant Heparine. Following centrifugation for 5 min at 9,289 rcf and  $4^\circ\text{C}$ , plasma samples were frozen and stored at  $-80^\circ\text{C}$  for later analysis. Brain samples were processed in two different ways: (1) fish were deeply anaesthetised with buffered MS-222 and fixed by vascular perfusion with 4% paraformaldehyde (PF) in 0.1 M Sørensen's phosphate buffer (PB; 28 mM  $\text{NaH}_2\text{PO}_4$ , 71 mM  $\text{Na}_2\text{HPO}_4$ , pH 7.2). The brains were dissected out and post fixed in fresh 4% PF in Sørensen's PB for 16 h at  $4^\circ\text{C}$ . The tissue was washed three times 20 min in PB, cryopreserved overnight in 25% sucrose in PB at  $4^\circ\text{C}$ , embedded in Tissue-Tek OCT-Compound (Sakura Fintek) and stored at  $-80^\circ\text{C}$  until sectioning for *in situ* hybridisation. (2) Fish were decapitated and whole heads placed in containers with Tissue-Tek O.C.T compound and immediately frozen in liquid nitrogen. Frozen brains were then placed in individually labelled tubes and stored at  $-80^\circ\text{C}$  until sectioning and microdissection for monoamine and gene expression analyses. Right and left lobes were randomised to control for any possible lateralisation differences. Since we did not find a lateralisation effect between right and left lobes the data were pooled (data not shown).

### Cortisol radioimmunoassay

Undiluted plasma (in duplicates) was assayed using a radioimmunoassay (RIA) following the procedure described by Gorissen et al. (2012). Intra- and inter-assay variations were 3.5 and 12.5%, respectively, and cross-reactivity of the cortisol antibody (antibody [xm210]; Abcam, Cambridge, MA, USA) was as follows: cortisol 100%, 11-deoxycortisol 0.9%, prednisolone 5.6%, corticosterone 0.6%, 11-deoxycorticosterone, progesterone, 17-hydroxyprogesterone, testosterone, oestradiol and oestriol all  $< 0.01\%$ .

## Brain sectioning and microdissections

Frozen whole heads were sliced in 100 µm serial sections using a Leica CM1950 cryostat (Leica, Wetzlar, Germany), at -18°C. The sliced tissue was thaw-mounted on glass slides, and refrozen at -80°C for micro dissection.

The glass slides were placed on a cooling plate set at -14°C. Using a microscope, three areas were microdissected using a modified 23G needle, the DI as a whole (for the purposes of this study, we did not distinguish between DI sub-regions), the Dm and the Vv as depicted in **Fig 1**. Brain regions were identified using several salmonid stereotaxic atlases (Carruth et al., 2000; Navas et al., 1995; Northcutt and Davis, 1983). Microdissections for the Vv area were collected until the appearance of the central part of the ventral telencephalon (Navas et al., 1995). On average, between 33-42 punches were taken for the DI, 33-43 for the Dm and 10-12 for the Vv area. Micro-dissected tissue (alternating left and right lobe of the telencephalon) was either injected into 50 µl Trizol® (Invitrogen, Carlsbad, CA, USA) for later analyses of gene expression, or into 50 µl sodium acetate buffer (pH = 5) containing an internal standard (3,4-Dihydroxybenzilamine Hydrobromine; DHBA) for monoamine analysis. All samples were stored at -80°C immediately after extraction.

## Monoaminergic neurochemistry

Frozen samples were thawed and centrifuged for 10 min at 15,493 rcf and 4°C. The supernatant was used in order to analyse monoamine neurochemistry by means of high-performance liquid chromatography (HPLC), while the remaining pellet was refrozen at -80°C for later analysis of protein concentration by means of a Bradford protein assay. Both the HPLC and the protein analysis methodology were performed as described in Vindas et al. (2014)

## Relative transcript abundance

Total RNA from telencephalic microdissected tissue was extracted by thawing frozen samples (immersed in 50 µl Trizol®), which were then vortexed and left for 5 min at room temperature before spinning for 20 min at 13,000 × g. Ice-cold 70% EtOH was then added to the samples. Next, samples were transferred into an RNAeasy column in 2-ml tubes and manufacturer's instructions for the RNeasy® Plus Mini kit (QIAGEN, West Sussex, UK) were followed from this step onwards. RNA concentrations were assessed using a NanoDrop® ND-1000 UV-Vis Spectrophotometer (NanoDrop Technologies, Rockland, DE, USA). RNA quality was inferred from RNA integrity numbers (RINs) calculated using a 2100 Bioanalyzer (Agilent Technologies, Palo Alto, CA, USA). A RIN ≥ 8 was accepted as sufficient RNA quality. First-strand cDNA was synthesised from 0.15 µg DNase I-treated (DNA-free™ Kit, Ambion Applied Biosystems) total RNA using Superscript III reverse transcriptase (Invitrogen, Carlsbad, CA, USA) with oligo dT12-18 primers synthesised by Invitrogen.

Gene sequences were retrieved using NCBI ([www.ncbi.nlm.nih.gov/](http://www.ncbi.nlm.nih.gov/); accession numbers are given in **Table S1**). Gene specific primers for Atlantic salmon for the remaining interest genes were designed using the web-based Primer3 programme ([http://frodo.wi.mit.edu/cgi-bin/primer3/primer3\\_www.cgi](http://frodo.wi.mit.edu/cgi-bin/primer3/primer3_www.cgi)) and synthesised by Invitrogen. Four primer pairs or more were designed, overlapping intron-exon junctions for each gene, and primer pairs with the lowest C<sub>q</sub>-values in the PCR, and a single peak in the melting

curve, were chosen and are listed in Table S1. The qPCR products were sequenced to verify that the primers amplified the right cDNA. qPCRs were carried out using a Roche LC480 light cycler® (Roche Diagnostics, Penzberg, Germany) as described by Johansen et al. (2011). The reference genes used were *ef1aa*, *S20* and *hprt1*. As *S20* yielded the lowest Cq-values and least variance both between and within plates, this gene was therefore chosen as internal control for calculation of relative expression ( $\Delta\Delta Cq$ ). All Cq values  $\geq 40$  were eliminated since such high numbers imply low efficiency. Furthermore, all Cq values above 35 were rejected based upon comparison between the Cq of the lowest concentration unknown and non-template controls, following procedures described by Bustin et al. (2009).

### ***In situ* hybridisation (ISH)**

ISH for *bdnf* and *cfos* transcript abundance (post-stress) was conducted on parallel sections of three Atlantic salmon per coping style. Adjacent transversal 12- $\mu$ m sections were cut using a Leica CM 1850 cryostat (Leica Microsystems, Wetzlar, Germany), collected on SuperFrost Ultra Plus glasses (Menzel Glaser) and dried at 65°C for 10 min. Digoxigenin-labeled riboprobes were prepared using a digoxigenin (DIG)-RNA labelling mix in accordance with the manufacturer's instructions (Roche Diagnostics, Mannheim, Germany). The ISH probes for *cfos* and *bdnf* were 906 and 485 nucleotides long, respectively. Forward ACTCCGCTTTCAACACCGAC and reverse TGTAGAGAGGCTCCCAGTCC and forward TCACAGACACGTTTGAGCAGGTGA and reverse ATGCCTCTTGCTATTCCACGGCA primers were used to clone the *cfos* and *bdnf* probes, respectively. The quality and quantity of the synthesised riboprobes were assessed by agarose gel electrophoresis. Pre-treatment and treatment of sample for ISH was conducted as specified by Ebbesson et al. (2011).

### **Statistical analyses.**

Two-way analysis of variance (ANOVA) was used to compare cortisol levels, monoaminergic neurochemistry and gene expression data, with coping style (reactive vs. proactive) and treatment (basal conditions vs. acute stress) as independent variables. Models were assessed by their capacity to explain the variability and interaction effects and were accepted or rejected according to total model "lack of fit" probabilities (provided by the ANOVA model). In addition, when an interaction effect between stress and coping style was found, planned contrast effect tests were conducted in order to ascertain differences between groups. A corrected  $\alpha = 0.01$  was used to establish significance for this four-way multiple comparisons. Before final acceptance of the model, diagnostic residual plots were examined to ensure that no systematic patterns occurred in the errors (e.g. fitted values vs. observed values and q-q plots). When necessary values were either log- (concentrations) or arcsine-transformed (ratios). Rejection criteria for Cq values resulted in several values being omitted, in particular for genes with a low transcript abundance. Therefore, these samples were not taken into consideration in the statistical analysis. Please see **Table S2** for 'n' numbers for each gene of interest. An overview of average Cq values and efficiencies for all target genes can be found in the **Table S3**.

## Results

### Hypoxia-response sorting

There was a clear difference in the individual reaction to an increasingly hypoxic environment. Approximately 45% of the fish remained in the hypoxic tank during the entire test period (*i.e.* reactive); whereas ~55% left the hypoxic conditions after some time and swam into the neighbouring normoxic tank (*i.e.* proactive). After the onset of the oxygen decline in the hypoxia tank we observed there was a linear reduction in oxygen levels between 0.05 and 0.10 mg O<sub>2</sub>/min. Most of the salmon remained inactive in the hypoxia tank until approximately 60 min after oxygen decline (at approximately 40% O<sub>2</sub> saturation), from that moment onwards, there was a steady flow of proactive fish migrating towards the normoxic tank. Notably, while some fish crossed back and forth between tanks during the first 60 min of O<sub>2</sub> decline, movement was exclusively unidirectional towards the normoxic tank thereafter. On average, proactive fish left the hypoxic tank after 69 min (at approximately 30.4% O<sub>2</sub> saturation), while reactive fish remained inactive in the hypoxia tank throughout the experiment (the end point of the experiment was set at 25% O<sub>2</sub> saturation, which was reached at approximately 80 min).

### Plasma cortisol levels

Cortisol basal and post-stress values were  $5 \pm 1$  ng ml<sup>-1</sup> and  $150 \pm 24$  ng ml<sup>-1</sup> for reactive and  $6 \pm 2$  ng ml<sup>-1</sup> and  $96 \pm 17$  ng ml<sup>-1</sup> (means  $\pm$  SEM.) for proactive fish, respectively. As predicted, both groups reacted with a significant increase in cortisol levels to acute stress ( $p < 0.005$ ). However, reactive individuals had significantly higher cortisol ( $p < 0.001$ ) than proactive fish, after the aforementioned acute stressor. ANOVA statistics: Style:  $F_{(3,108)} = 14$ ,  $p < 0.001$ , Stress:  $F_{(3,108)} = 143$ ,  $p < 0.001$ , Interaction (style  $\times$  stress):  $F_{(3,108)} = 9.36$ ,  $p = 0.002$ .

### Monoamine neurochemistry

Regarding serotonin (5-hydroxytryptamine, 5-HT) and its main catabolite 5-hydroxyindoleacetic acid (5-HIAA), we found that only proactive fish displayed higher 5-HIAA concentrations after stress in the Dm ( $p < 0.001$ ; **Fig. 2**), with a tendency for 5-HIAA levels to be higher in proactive compared to reactive post-stress ( $p = 0.03$ ; corrected  $\alpha \leq 0.01$ ). Fish from both coping styles responded with an increase in 5-HIAA levels after stress in the Dl (**Fig. 2**). No significant changes in Dl or Dm 5-HT levels were found. Surprisingly, 5-HT and 5-HIAA levels in the Vv were below level of detection.

Reactive fish had overall higher concentrations of both dopamine (DA;  $p = 0.02$ ) and its main catabolite 3,4-dihydroxyphenylacetic acid (DOPAC;  $p = 0.007$ ) compared to proactive individuals in the Dl. No other statistically significant differences were evident in the Dm or Vv (Fig. 2). Interestingly, DA and DOPAC concentrations in the Vv were nine and seven-fold higher, than those in the Dl and Dm, respectively. This suggests that DA signalling in this area may be particularly important, but perhaps not under the present conditions of our study.

## Relative transcript abundance

We analysed two paralogues for both the 5-HT<sub>1A</sub> receptor (5-HT<sub>1Aα</sub> and 5-HT<sub>1Aβ</sub>) and the 5-HT transporter (5-HTTA and 5-HTTB). Region-specific analysis showed an overall higher transcript abundance (*i.e.* at both basal and acute stress conditions) of both 5-HT<sub>1Aα</sub> and 5-HT<sub>1Aβ</sub> in the Dm ( $p \leq 0.02$ ) and 5-HT<sub>1Aβ</sub> in the Vv ( $p \leq 0.04$ ) in proactive, compared to reactive fish (**Fig. 3**). Both 5-HT transporter paralogues had a low transcript abundance in the micro dissected telencephalic areas. In fact, 5-HTTB was below detection levels and 5-HTTA was mainly expressed in the Dm.

The relative mRNA abundance of the neural plasticity marker *bdnf* was significantly increased in response to stress in both DI ( $p = 0.002$ ) and Vv ( $p = 0.005$ ), of proactive individuals only (**Fig. 3**). The neural proliferation marker *proliferating cell nuclear antigen* (*pcna*) was higher in the DI of reactive fish at basal conditions, compared to proactive individuals ( $p = 0.008$ ) and downregulated in the DI post-stress in reactive fish only ( $p = 0.01$ , **Fig. 3**). There were no statistically significant differences in transcript abundance of the cell differentiation marker *neurod* in any of the studied areas and experimental groups.

We also analysed transcript abundance of *crf*, *crf*-binding protein (*crfbp*) and the CRF receptors 1 (*crf1*) and 2 (*crf2*). We found that relative levels of *crf* mRNA showed no differences in the DI or Dm. There were no effects in *crfbp* expression in the DI, but there was a tendency for proactive individuals to have higher expression of *crfbp* compared to reactive fish after stress in the Dm ( $p = 0.03$ , corrected  $\alpha \leq 0.01$ ). The *crf1* expression in the DI was elevated overall in proactive, compared to reactive fish ( $p = 0.02$ ). No differences in *crf1* expression were found in the Dm (**Fig. 4**). Expression of *crf2* was not detectable in any of the microdissected areas. In addition, we found little to none expression of any of the studied genes of the CRF system in the Vv.

An overview of coping style and stress-induced differences for all studied variables is given in **Table S2**. Average Cq values and efficiencies for genes are provided in **Table S3**.

### *In situ* hybridisation (ISH)

ISH analysis of *cfos* and *bdnf* transcript abundance showed clear post-stress activation of our target telencephalic areas, *viz.* DI, Dm and Vv, in both coping styles (**Fig. 5**). In addition, we found differences in spatial distribution of *cfos* and *bdnf* positive cells between coping styles, which suggests a heterogeneity of activation within target regions. Notably, basal levels of transcript abundance were not detectable, most likely due to the fact that since all samples were processed together, we had to stop the colouring reaction before any cells were clearly labelled at basal conditions to avoid background staining in post-stress samples.



## Discussion

We demonstrate that in response to stress, individual salmon react with a different behavioural output, which is accompanied by specific changes in transcript abundance and monoamine neurochemistry in forebrain areas. We found clear differences between proactive and reactive fish, at both basal and post-stress conditions, with respect to abundance of signalling molecules in the (cortical-like structures) dorsolateral (Dl) and dorsomedial (Dm) pallium, as well as the subpallial ventral part of the ventral telencephalon (Vv). These signalling molecules include monoamines, downstream genes for the serotonin (5-HT) and corticotropin-releasing factor (CRF) systems, and markers for neural plasticity and cell proliferation. In addition, we found a differential effect of post-stress plasma cortisol concentrations, between coping styles. These results provide evidence that distinct telencephalic neuronal networks in fish are important centres for processing stimuli, which result in distinct and individual behavioural responses; *e.g.* we show how changes in neuronal plasticity and serotonergic signalling in the Dm appear to be characteristic to proactive fish in response to an acute stressor. These results will be fundamental for the advancement of fish animal models, which are increasingly being used in studies on central nervous system (dys)function.

In response to an increasing hypoxic environment, not all individuals showed the same behavioural response. We observed that most of the individuals that, proactively, escaped their immediate hypoxic surroundings into the neighbouring normoxic tank, did so once oxygen saturation declined to ~30%. Once left, they never went back into the hypoxic tank, while others chose a more passive response and remained in their original tank, even at very low oxygen levels (25% O<sub>2</sub> saturation). Notably, the response of fish to hypoxia as a group-based test for selection of coping styles, has been found to be highly consistent in European seabass (*Dicentrarchus labrax*, L.; (Ferrari et al., 2015), as well as Atlantic salmon (Thörnqvist et al., 2015 and Damsgård et al. in preparation). We found that the fish that stayed exhibited a passive response to hypoxia, accompanied by higher post-stress cortisol levels to acute stress compared to the ones that left, which is indicative of reactive and proactive coping styles, respectively (Ruiz-Gomez et al., 2011; Ruiz-Gomez et al., 2008; Schjolden et al., 2005; Øverli et al., 2007).

Mechanisms that aid an organism to cope with environmental changes regulate individual differences in motivation, which is only possible through differences regulation of the neural network and processing of environmental input (Ebbesson and Braithwaite, 2012; Zupanc and Lamprecht, 2000). It is now well-accepted that a complex structural and functional activation of neural networks (in particular forebrain cell populations), molecular processes and neurotransmitter systems (*e.g.* the CRF and the 5-HT system) underlie different coping styles (Koolhaas et al., 2010; Puglisi-Allegra and Andolina, 2015). In our study, proactive fish were characterised by increased serotonergic signalling, particularly in the Dm (proposed homologue of the amygdala). That is, proactive fish responded to stress with a significant increase in serotonergic activity (measured as changes in 5-HT's main catabolite, 5-HIAA (Shannon et al., 1986)) in the Dm and had an overall higher expression (at both basal and acute stress conditions) of both the 5-HT<sub>1A</sub> receptor paralogs in the Dm and of 5-HT<sub>1Aβ</sub> in the Vv (proposed lateral septum homologue). In agreement with our results, proactive

animals are characterised by higher 5-HT neurotransmission, particularly after acute stress (Koolhaas et al., 2007; Koolhaas et al., 2010; Koolhaas et al., 1999), specifically in the mammalian amygdala and lateral septum (Veenema and Neumann, 2007). Notably, regional differences in *5-HT<sub>1A</sub>* transcript abundance are important since these results support the notion that differential 5-HT receptor distribution in neuronal networks (at least partially) determines active and passive coping strategies (Puglisi-Allegra and Andolina, 2015).

Proactive fish responded to the stressor with increased *bdnf* mRNA abundance in the DI which is the proposed hippocampus homologue (Goodson and Kingsbury, 2013; O'Connell and Hofmann, 2011; Vargas et al., 2009) and the Vv. Synaptic plasticity is promoted by *bdnf*, as is neurogenesis, cell survival, and the strengthening of learning and memory (Mattson et al., 2004). Recently, Smith et al. (2014) characterised forebrain *bdnf* expression in mice that displayed differential behavioural responses to social aggression and fear conditioning. They reported that mice that chose to escape an aggressive conspecific, showed higher *bdnf* abundance in the amygdala, compared to individuals that did not escape. Similarly, we also found increased *bdnf* mRNA abundance after an acute stressor in proactive animals, which had previously chosen to leave an increasingly unfavourable (*i.e.* hypoxic) environment, although this was in the DI and Vv and not in the Dm. The increase of *bdnf* in different functional brain areas might be due to the nature of the stressful stimuli utilised in each experiment (in Smith and colleagues' study, the mice were subjected to an aggressive conspecific, while in our experiment fish were subjected to crowding stress). In mammals, the hippocampus and lateral septum are associated with memory, learning and goal-oriented behaviour (Jarrard, 1993; Luo et al., 2011; O'Connell and Hofmann, 2012). When we extrapolate these functional roles to the fish's proposed telencephalic equivalents, it is tempting to hypothesise that this increase in *bdnf* may help proactive fish in displaying a greater behavioural reactivity to acute stressors (*i.e.* active coping), particularly considering that the fish DI has been highly associated with memory and spatial navigation (Broglio et al., 2015; Vargas et al., 2009). It would therefore be interesting to characterise the learning ability of proactive and reactive individuals in response to different stressful situations to further explore this hypothesis.

Interestingly, reactive fish had higher basal *proliferating cell nuclear antigen (pcna)* transcript abundance in the DI, compared to proactive individuals. In agreement with our results, Johansen and colleagues (2012) report higher *pcna* abundance in reactive compared to proactive rainbow trout after short-term confinement (*i.e.* acute stress). This may be particularly important since reactive fish show greater behavioural flexibility regarding routine formation than proactive individuals (Ruiz-Gomez et al., 2011). Notably, we believe that our results compliment the information previously reported by Johansen and colleagues, since it pin-points a specific telencephalic subregion, the DI, in which there is higher *pcna* abundance in reactive fish. However, in our experiment we did find an increase in *pcna* abundance to acute stress in the studied telencephalic subregions, in fact, there was an overall downregulation in *pcna* to stress in the Vv. We believe that this illustrates the importance of studying region-specific areas within the brain, since it may allow for a better understanding of the activation of specific neuronal populations in response to stimuli. In our experiment, reactive fish also exhibited higher dopamine (DA) activity in the DI. DA signalling in limbic areas is associated with increased attention and arousal (Alcaro et al., 2007; Redgrave et al., 1999). Notably, in a previous study, we found that Atlantic salmon experiencing

unpredictability of reward where characterised by a potentiated brain dopaminergic system (Vindas et al., 2014), which suggest that the link between DA signalling and increased attention is also present in salmon. Our current results suggest that, compared to proactive fish, reactive individuals express elevated markers for increased perception and attention in the Dl, which are important for memory and learning (O'Connell and Hofmann, 2012).

The biological effect of corticotropin-releasing factor (CRF) is mediated through its receptors (CRF<sub>1</sub> and CRF<sub>2</sub>) and binding protein (CRFBP), which regulate the stress response, appetite and modulates the immune response (Flik et al., 2006; Manuel et al., 2014). We found that *crf1* mRNA levels in the Dl were higher in proactive fish (at both basal and acute stress conditions). In mammals, telencephalic CRF mediates an array of responses such as anxiety-like behaviour, increased arousal and altered locomotor activity (Owens and Nemeroff, 1991). Presently, we cannot say if this holds in fish, but considering our results and the fact that *crf* receptors have been associated with alternate coping styles in fish (Puglisi-Allegra and Andolina, 2015), further investigation should be focused towards the role of this system in the regulation of alternate coping styles. Notably, we found that the abundance of *crf*, and *crfbp* (as well as the *crf1* and *crf2* receptor) genes was low in the Vv (see S3 Table for Cq values). There is evidence that both *crf* and *crfbp* are expressed in the Vv of zebrafish (Alderman and Bernier 2007), so either there are notable species-specific differences amongst teleosts, or the conditions studied in our experiment result in downregulation of these genes in the Vv. It is likely, that these genes may show higher regulation in hypothalamic areas, like the preoptic area, since it is there that the stress axis is activated. Therefore, it would be interesting to study this area under similar conditions in future studies.

Interestingly, our ISH results on *bdnf* and *c-fos* mRNA abundance show differences in spatial distribution of post-stress labelled cells between coping styles, which suggests heterogeneity of activation within target regions. That is, while *c-fos* labelled cells in the Dm of proactive fish show an even distribution over the whole region, this is not the case in reactive fish, in which labelled cells are found mainly in the upper part of the Dm. Similarly, *c-fos* labelled cells in the Vv of proactive individuals were found mainly in the upper area of this region, while they were distributed throughout the Vv in reactive fish. Interestingly, while *bdnf* labelled cells in the Vv of both reactive and proactive fish show similar activation, this appears to be the result of not only the same, but also different subpopulations within the Vv's neuronal network. It has become increasingly clear that telencephalic neuronal populations are highly heterogenic in teleost fishes, where subpopulations within regions, such as the Dl, contain functionally equivalent structures to mammalian nuclei (Broglio et al., 2015). In the present study, the entire Dl, Dm and Vv were sampled; the differential activation *within* these regions remains to be determined. Further research should be directed towards dissecting these complexes within distinct teleostean telencephalic areas, especially since it is becoming increasingly clear that the brain in early vertebrates is not as simple as it once was thought (Ocaña et al., 2015).

## Conclusion

Vertebrate models, such as fish, are increasingly being used to study human mental disorders and dysfunctions (Panula et al., 2006). Notably, knowing the evolutionary history of mammalian forebrain networks, as well as their functional equivalents in fish, is crucial for the advancement and correct interpretation of these translational models. Here we present original data on the proposed teleostean functional equivalents to the amygdala, hippocampus and lateral septum, in a fish population screened for different coping styles. We found that there are marked differences between reactive and proactive fish, particularly after stress that find resemblance in mammals. Proactive fish were characterised by a stress-induced increase in 5-HT signalling in the Dm as well as higher *bdnf* transcript abundance in the Dl and Vv, accompanied by lower post-stress cortisol levels, compared to reactive individuals. At basal levels, however, reactive fish showed increased *pcna* mRNA levels and DA activity in the Dl. We hope that these results inspire more functional neuroanatomical research in fish to understand how evolutionarily conserved and complex neural systems regulate perception, attention and stimuli salience to the surrounding environment, as well as their link to disease vulnerability.

## Acknowledgements

The authors would like to thank Tom Spanings (Radboud University) and Sonia Rey (University of Stirling) for their assistance with sampling, and Thamar Pelgrim (Radboud University) for her assistance with cortisol analyses.

## Competing interests

The authors declare no competing or financial interests.

## Author contributions

Conceptualisation, B.D., L.O.E.E., E.H., Ø.Ø., S.W., G.F., M.A.V.; Methodology, B.D., M.A.V., L.O.E.E.; Validation, B.D., M.A.V., V.T.; Formal Analysis, M.A.V., M.G., E.H., V.T.; Investigation, B.D., M.A.V., L.O.E.E., Ø.Ø., M.G.; Resources, T.O.N., P-O.T. Writing - Original draft, M.A.V.; Writing - Review and Editing, M.A.V., M.G., G.F., Ø.Ø., L.O.E.E., E.H.; Supervision, B.D., Ø.Ø., E.H., L.O.E.E., G.F., S.W.; Project Administration, L.O.E.E., B.D.; Funding Acquisition, L.O.E.E., Ø.Ø., E.H., B.D., G.F., S.W.

## Funding statement

This research was funded by the European Commission under the 7th Framework Program FP7-KBBE-2010-4 Contract no: 265957 COPEWELL.

## Data accessibility

All relevant data are within the paper and its Supporting Information files.

## References

- Alcaro, A., Huber, R. and Panksepp, J.** (2007). Behavioral functions of the mesolimbic dopaminergic system: An affective neuroethological perspective. *Brain Res Rev* **56**, 283-321.
- Alderman, S.L. and Bernier, N.J.** (2007). Localization of corticotropin-releasing factor, urotensin I, and CRF-binding protein gene expression in the brain of the zebrafish, *Danio rerio*. *J Comp Neurol* **502(5)** 783-793
- Bari, A. and Robbins, T. W.** (2013). Inhibition and impulsivity: Behavioral and neural basis of response control. *Progr Neurobiol* **108**, 44-79.
- Broglio, C., Martín-Monzón, I., Ocaña, F. M., Gómez, A., Durán, E., Salas, C. and Rodríguez, F.** (2015). Hippocampal Pallium and Map-Like Memories through Vertebrate Evolution. *J Behav Brain Sci* **5**, 109.
- Bshary, R. and Brown, C.** (2014). Fish cognition. *Curr Biol* **24**, R947-R950.
- Bustin, S. A., Benes, V., Garson, J. A., Hellemans, J., Huggett, J., Kubista, M., Mueller, R., Nolan, T., Pfaffl, M. W., Shipley, G. L. et al.** (2009). The MIQE guidelines: Minimum information for Publication of Quantitative Real-Time PCR Experiments. *Clin Chem* **55**, 611-622.
- Carruth, L. L., Jones, R. E. and Norris, D. O.** (2000). Cell density and intracellular translocation of glucocorticoid receptor-immunoreactive neurons in the Kokanee salmon (*Oncorhynchus nerka kennerlyi*) brain, with an emphasis on the olfactory system. *Gen Comp Endocrinol* **117**, 66-76.
- Demski, L.** (1983). Behavioral effects of electrical stimulation of the brain. In *Fish neurobiology*, vol. 2 eds. R. E. Davis and R. G. Northcutt), pp. 317-359. Ann Arbor: University of Michigan Press.
- Dingemans, N. J., Kazem, A. J. N., Réale, D. and Wright, J.** (2010). Behavioural reaction norms: animal personality meets individual plasticity. *Trends Ecol Evol* **25**, 81-89.
- Ebbesson, L. O. E. and Braithwaite, V. A.** (2012). Environmental effects on fish neural plasticity and cognition. *J Fish Biol* **81**, 2151-2174.
- Ebbesson, L. O. E., Nilsen, T. O., Helvik, J. V., Tronci, V. and Stefansson, S. O.** (2011). Corticotropin-releasing factor neurogenesis during midlife development in salmon: genetic, environmental and thyroid hormone regulation. *J Neuroendocrinol* **23**, 733-741.
- Ferrari, S., Millot, S., Leguay, D., Chatain, B. and Bégout, M.-L.** (2015). Consistency in European seabass coping styles: A life-history approach. *Appl Anim Behav Sci* **167**, 74-88.
- Flik, G., Klaren, P. H. M., Van den Burg, E. H., Metz, J. R. and Huising, M. O.** (2006). CRF and stress in fish. *Gen Comp Endocrinol* **146**, 36-44.
- Goodson, J. L. and Kingsbury, M. A.** (2013). What's in a name? Considerations of homologies and nomenclature for vertebrate social behavior networks. *Horm Behav* **64**, 103-112.
- Gorissen, M., Bernier, N. J., Manuel, R., de Gelder, S., Metz, J. R., Huising, M. O. and Flik, G.** (2012). Recombinant human leptin attenuates stress axis activity in common carp (*Cyprinus carpio* L.). *Gen Comp Endocrinol* **178**, 75-81.
- Grosenick, L., Clement, T. S. and Fernald, R. D.** (2007). Fish can infer social rank by observation alone. *Nature* **445**, 429-432.
- Ito, H., Ishikawa, Y., Yoshimoto, M. and Yamamoto, N.** (2007). Diversity of brain morphology in teleosts: brain and ecological niche. *Brain Behav Evol* **69**, 76-86.
- Ito, H. and Yamamoto, N.** (2009). Non-laminar cerebral cortex in teleost fishes? *Biol Lett* **5(1)**: 117-121
- Jarrard, L. E.** (1993). On the role of the hippocampus in learning and memory in the rat. *Behav Neural Biol* **60**, 9-26.
- Johansen, I. B., Sandvik, G. K., Nilsson, G. E., Bakken, M. and Øverli, Ø.** (2011). Cortisol receptor expression differs in the brains of rainbow trout selected for divergent cortisol responses. *Comp Biochem Physiol* **6D**, 126-132.
- Johansen, I. B., Sørensen, C., Sandvik, G. K., Nilsson, G. E., Höglund, E., Bakken, M. and Øverli, Ø.** (2012). Neural plasticity is affected by stress and heritable variation in stress coping style. *Comp Biochem Physiol* **7D**, 161-171.

- Karten, H. J.** (1991). Homology and evolutionary origins of the 'neocortex'. *Brain Behav Evol* **38**, 264-272.
- Koolhaas, J. M.** (2008). Coping style and immunity in animals: Making sense of individual variation. *Brain Behav Immun* **22**, 662-667.
- Koolhaas, J. M., de Boer, S. F., Buwalda, B. and van Reenen, K.** (2007). Individual variation in coping with stress: A multidimensional approach of ultimate and proximate mechanisms. *Brain Behav Evol* **70**, 218-226.
- Koolhaas, J. M., de Boer, S. F., Coppens, C. M. and Buwalda, B.** (2010). Neuroendocrinology of coping styles: Towards understanding the biology of individual variation. *Front Neuroendocrinol* **31**, 307-321.
- Koolhaas, J. M., Korte, S. M., De Boer, S. F., Van Der Vegt, B. J., Van Reenen, C. G., Hopster, H., De Jong, I. C., Ruis, M. A. W. and Blokhuis, H. J.** (1999). Coping styles in animals: current status in behavior and stress-physiology. *Neurosci Biobehav Rev* **23**, 925-935.
- Luo, A. H., Tahsili-Fahadan, P., Wise, R. A., Lupica, C. R. and Aston-Jones, G.** (2011). Linking context with reward: A functional circuit from hippocampal CA3 to ventral tegmental area. *Science* **333**, 353-357.
- Manuel, R., Metz, J. R., Flik, G., Vale, W. W. and Huising, M. O.** (2014). Corticotropin-releasing factor-binding protein (CRF-BP) inhibits CRF-and urotensin-I-mediated activation of CRF receptor-1 and-2 in common carp. *Gen Comp Endocrinol* **202**, 69-75.
- Maruska, K. P., Becker, L., Neboori, A. and Fernald, R. D.** (2013). Social descent with territory loss causes rapid behavioral, endocrine and transcriptional changes in the brain. *J Exp Biol* **216**, 3656-3666.
- Mattson, M. P., Maudsley, S. and Martin, B.** (2004). BDNF and 5-HT: a dynamic duo in age-related neuronal plasticity and neurodegenerative disorders. *Trends Neurosci* **27**, 589-594.
- Navas, J. M., Anglade, I., Bailhache, T., Pakdel, F., Breton, B., Jégo, P. and Kah, O.** (1995). Do gonadotrophin-releasing hormone neurons express estrogen receptors in the rainbow trout? A double immunohistochemical study. *J Comp Neurol* **363**, 461-474.
- Northcutt, R. G. and Davis, R. E.** (1983). Telencephalic organization in ray finned fishes. In *Fish neurobiology*, vol. 2 eds. R. G. Northcutt and R. E. Davis), pp. 205-217. Ann Arbor: University of Michigan.
- O'Connell, L. A. and Hofmann, H. A.** (2011). The Vertebrate mesolimbic reward system and social behavior network: A comparative synthesis. *J Comp Neurol* **519**, 3599-3639.
- O'Connell, L. A. and Hofmann, H. A.** (2012). Evolution of a vertebrate social decision-making network. *Science* **336**, 1154-1157.
- Ocaña, F. M., Suryanarayana, S. M., Saitoh, K., Kardamakis, A. A., Capantini, L., Robertson, B. and Grillner, S.** (2015). The lamprey pallium provides a blueprint of the mammalian motor projections from cortex. *Curr Biol* **25**, 413-423.
- Owens, M. J. and Nemeroff, C. B.** (1991). Physiology and pharmacology of corticotropin-releasing factor. *Pharmacol Rev* **43**, 425-473.
- Panula, P., Sallinen, V., Sundvik, M., Kolehmainen, J., Torkko, V., Tiittula, A., Moshnyakov, M. and Podlasz, P.** (2006). Modulatory neurotransmitter systems and behavior: Towards zebrafish models of neurodegenerative diseases. *Zebrafish* **3**, 235-247.
- Puglisi-Allegra, S. and Andolina, D.** (2015). Serotonin and stress coping. *Behav Brain Res* **277**, 58-67.
- Redgrave, P., Prescott, T. J. and Gurney, K.** (1999). Is the short-latency dopamine response too short to signal reward error? *Trends Neurosci* **22**, 146-151.
- Ruiz-Gomez, M. L., Huntingford, F. A., Øverli, Ø., Thörnqvist, P.-O. and Höglund, E.** (2011). Response to environmental change in rainbow trout selected for divergent stress coping styles. *Physiol Behav* **102**, 317-322.
- Ruiz-Gomez, M. L., Kittilsen, S., Höglund, E., Huntingford, F. A., Sørensen, C., Pottinger, T. G., Bakken, M., Winberg, S., Korzan, W. J. and Øverli, Ø.** (2008). Behavioral plasticity in rainbow trout (*Oncorhynchus mykiss*) with divergent coping styles: When doves become hawks. *Horm Behav* **54**, 534-538.

- Schjolden, J., Backström, T., Pulman, K. G. T., Pottinger, T. G. and Winberg, S.** (2005). Divergence in behavioural responses to stress in two strains of rainbow trout (*Oncorhynchus mykiss*) with contrasting stress responsiveness. *Horm Behav* **48**, 537-544.
- Schjolden, J., Pulman, K. G. T., Pottinger, T. G., Tottmar, O. and Winberg, S.** (2006). Serotonergic characteristics of rainbow trout divergent in stress responsiveness. *Physiol Behav* **87**, 938-947.
- Seiffge-Krenke, I.** (2011). Coping with relationship stressors: a decade review. *J Res Adolesc* **21**, 196-210.
- Shannon, N. J., Gunnet, J. W. and Moore, K. E.** (1986). A comparison of biochemical indices of 5-hydroxytryptaminergic neuronal activity following electrical stimulation of the dorsal raphe nucleus. *J Neurochem* **47**, 958-965.
- Shimizu, T.** (2007). The avian brain revisited: anatomy and evolution of the telencephalon. In *Integration of comparative neuroanatomy and cognition*, eds. S. Watanabe and M. H. Hofman, pp. 55-73. Tokyo: Keio University Publications.
- Silva, P. M., Martins, C. I. M., Höglund, E., Gjøn, H. M. and Øverli, Ø.** (2014). Feeding motivation as a personality trait in Nile tilapia (*Oreochromis niloticus*): role of serotonergic neurotransmission. *Fish Physiol Biochem* **40**, 1547-1557.
- Singewald, G. M., Rjabokon, A., Singewald, N. and Ebner, K.** (2011). The modulatory role of the lateral septum on neuroendocrine and behavioral stress responses. *Neuropsychopharmacology* **36**, 793-804.
- Smith, J. P., Achua, J. K., Summers, T. R., Ronan, P. J. and Summers, C. H.** (2014). Neuropeptide S and BDNF gene expression in the amygdala are influenced by social decision-making under stress. *Front Behav Neurosci* **8**, 121.
- Thörnqvist, P.-O., Höglund, E. and Winberg, S.** (2015). Natural selection constrains personality and brain gene expression differences in Atlantic salmon (*Salmo salar*). *J Exp Biol* **218**, 1077-1083.
- Vargas, J. P., López, J. C. and Portavella, M.** (2009). What are the functions of fish brain pallium? *Brain Res Bull* **79**, 436-440.
- Veenema, A. H. and Neumann, I. D.** (2007). Neurobiological mechanisms of aggression and stress coping: A comparative study in mouse and rat selection lines. *Brain Behav Evol* **70**, 274-285.
- Vindas, M. A., Johansen, I. B., Vela-Avitua, S., Nørstrud, K. S., Aalgaard, M., Braastad, B. O., Höglund, E. and Øverli, Ø.** (2014). Frustrative reward omission increases aggressive behaviour of inferior fighters. *Proc R Soc Lond B* **281**.
- Vindas, M. A., Sørensen, C., Johansen, I.B., Folkedal, O., Höglund, E., Khan, U.W., Stien, L.H., Kristiansen, T.S., Braastad, B.O., Øverli, Ø.** (2014) Coping with unpredictability: Dopaminergic and neurotrophic responses to omission of expected reward in Atlantic salmon (*Salmo salar* L.). *PLoS ONE* **9**(1) e85543
- Zupanc, G. K. H. and Lamprecht, J.** (2000). Towards a cellular understanding of motivation: Structural reorganization and biochemical switching as key mechanisms of behavioral plasticity. *Ethology* **106**, 467-477.
- Øverli, Ø., Pottinger, T. G., Carrick, T. R., Øverli, E. and Winberg, S.** (2001). Brain monoaminergic activity in rainbow trout selected for high and low stress responsiveness. *Brain Behav Evol* **57**, 214-224.
- Øverli, Ø., Sørensen, C., Pulman, K. G. T., Pottinger, T. G., Korzan, W., Summers, C. H. and Nilsson, G. E.** (2007). Evolutionary background for stress-coping styles: Relationships between physiological, behavioral, and cognitive traits in non-mammalian vertebrates. *Neurosci Biobehav Rev* **31**, 396-412.

## Figures

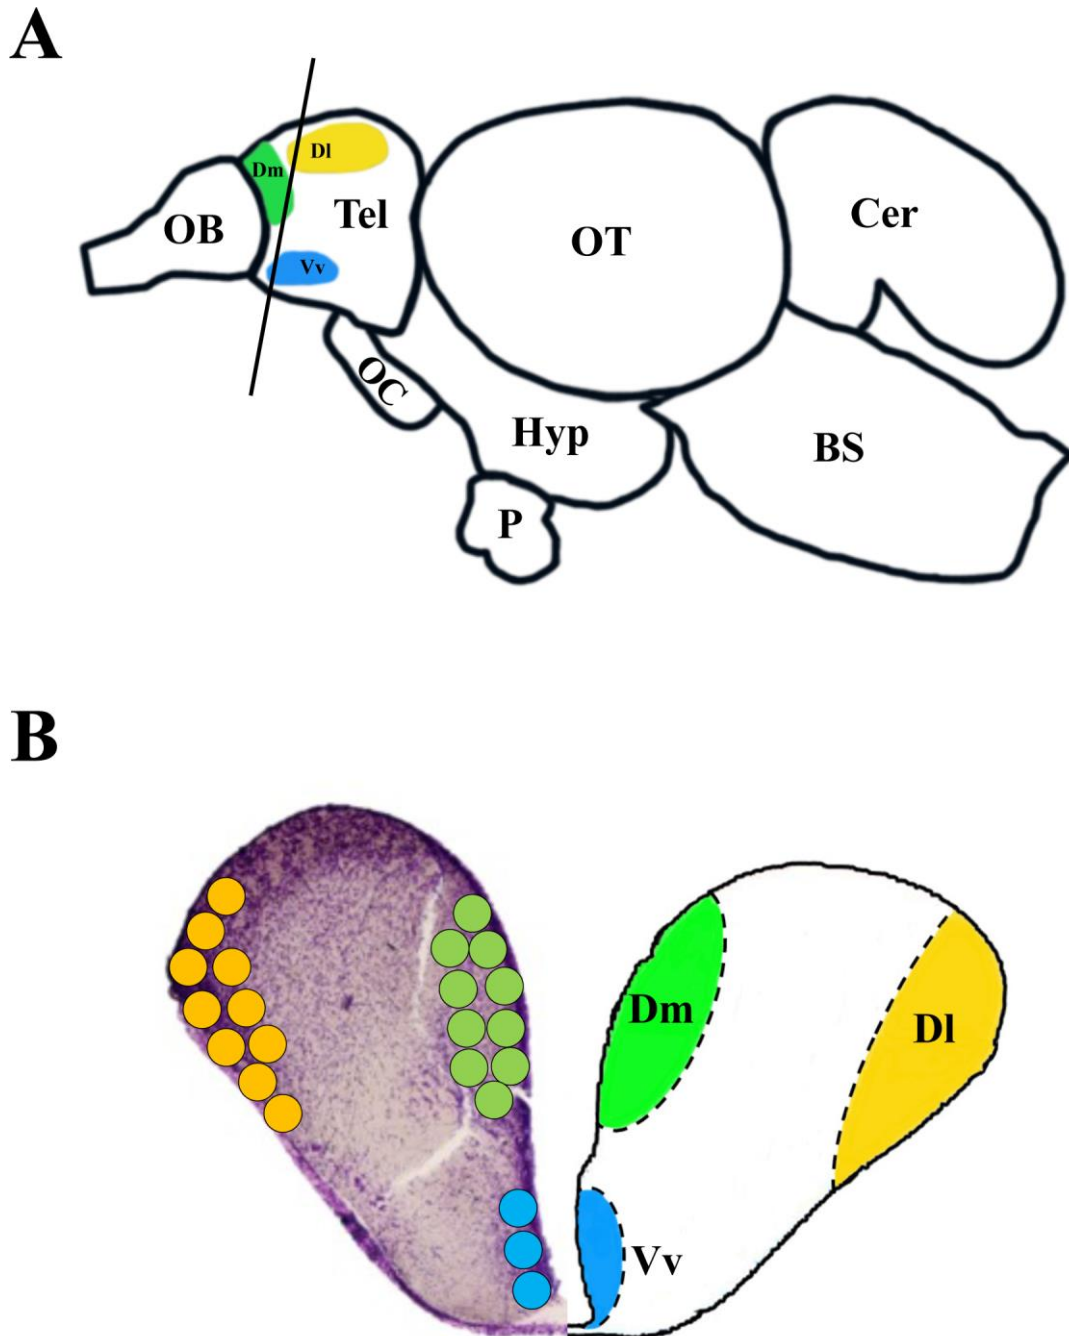

**Fig. 1** Sagittal (A) and the telencephalic transverse (B) view of an Atlantic salmon brain. The transverse section of the telencephalon consists of, on the right, a diagram depicting the location of the dorsolateral pallium (Dl), the dorsomedial pallium (Dm) and the ventral part of the ventral telencephalon (Vv) and, on the left, microdissected areas on a Cresyl Violet Nissl stained section showing removed tissue sections for each telencephalic subregion. BS: brain stem, Cer: cerebellum, Hyp: hypothalamus, OB: olfactory bulb, OC: optic chiasm, OT: optic tectum, P: pituitary.



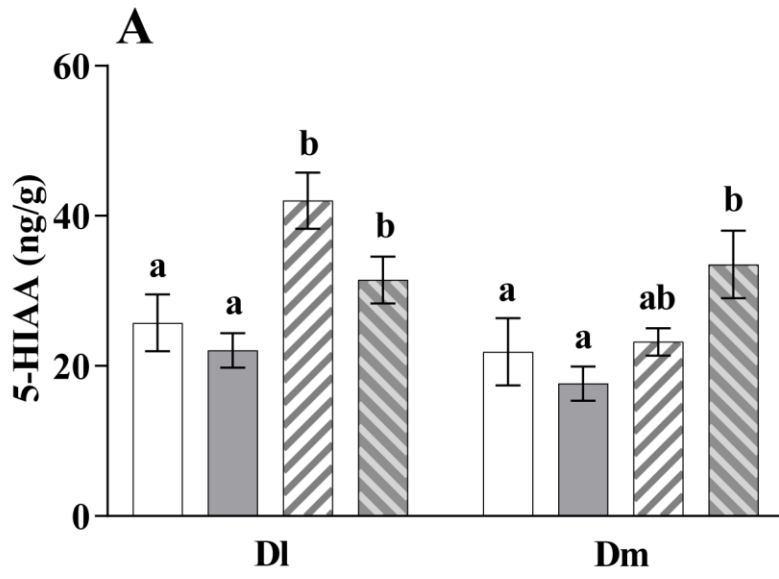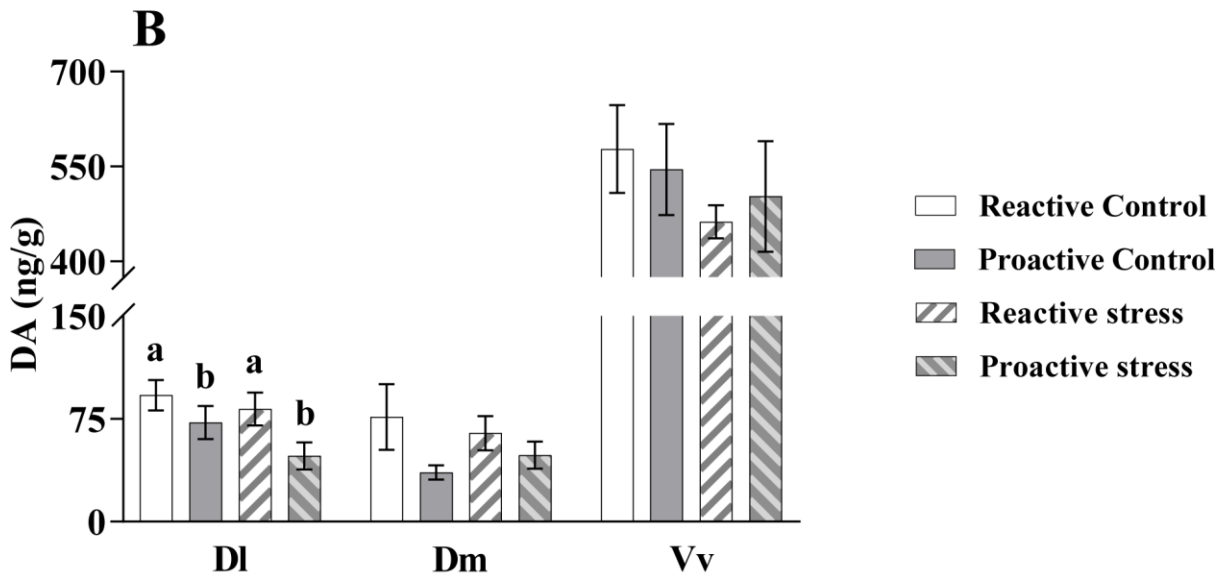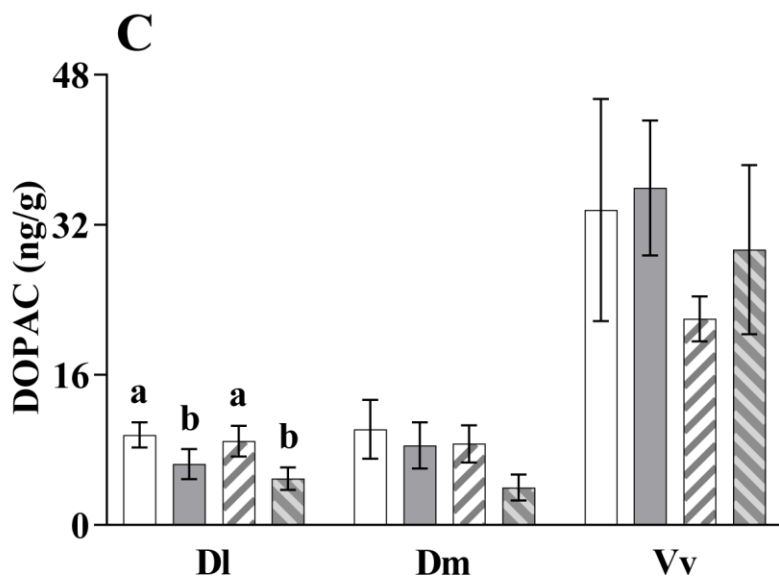

**Fig. 2** Effect of coping style (proactive *vs.* reactive) and stress (basal *vs.* acute stress) on 5-HIAA (**A**) dopamine (DA; **B**) and DOPAC (**C**) neurochemistry in the dorsolateral pallium (Dl), the dorsomedial pallium (Dm) and in the ventral part of the ventral telencephalon (Vv) of Atlantic salmon. Lower case letters indicate significant ANOVA differences within style and/or stress groups in each telencephalic subregion (*i.e.* not between subregions). Data are presented as mean  $\pm$  SEM.

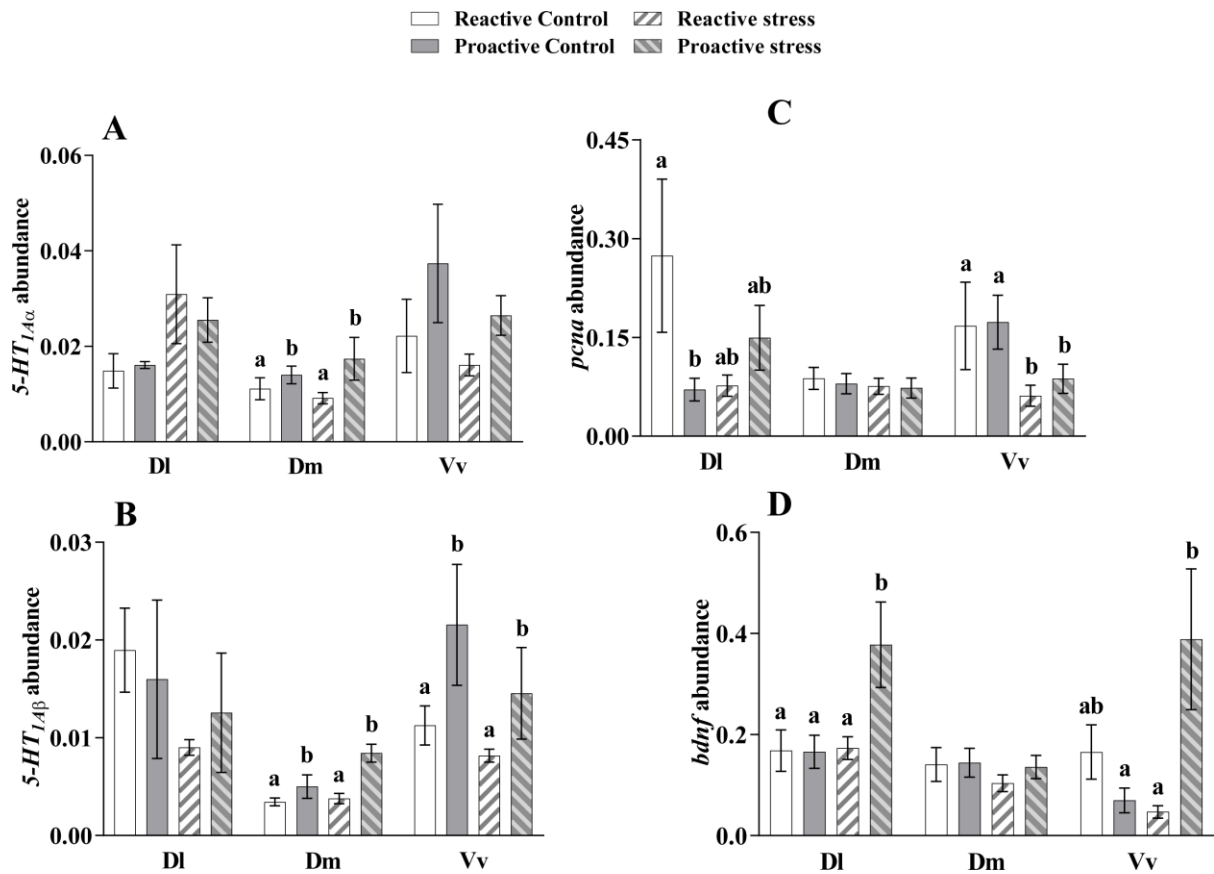

**Fig. 3** Effect of coping style (proactive vs. reactive) and stress (basal vs. acute stress) on the relative mRNA abundance (to the *S20* reference gene) of the serotonin receptors *5-HT<sub>1Aα</sub>* (A) and *5-HT<sub>1Aβ</sub>* (B), the *proliferating cell nuclear antigen* (*pcna*, C), and the *brain derived neurotrophic factor* (*bdnf*, D) in the dorsolateral pallium (Dl), the dorsomedial pallium (Dm) and in the ventral part of the ventral telencephalon (Vv) of Atlantic salmon. Lower case letters indicate significant ANOVA differences within style and/or stress groups in each telencephalic subregion (*i.e.* not between subregions). Data are presented as mean ± SEM.

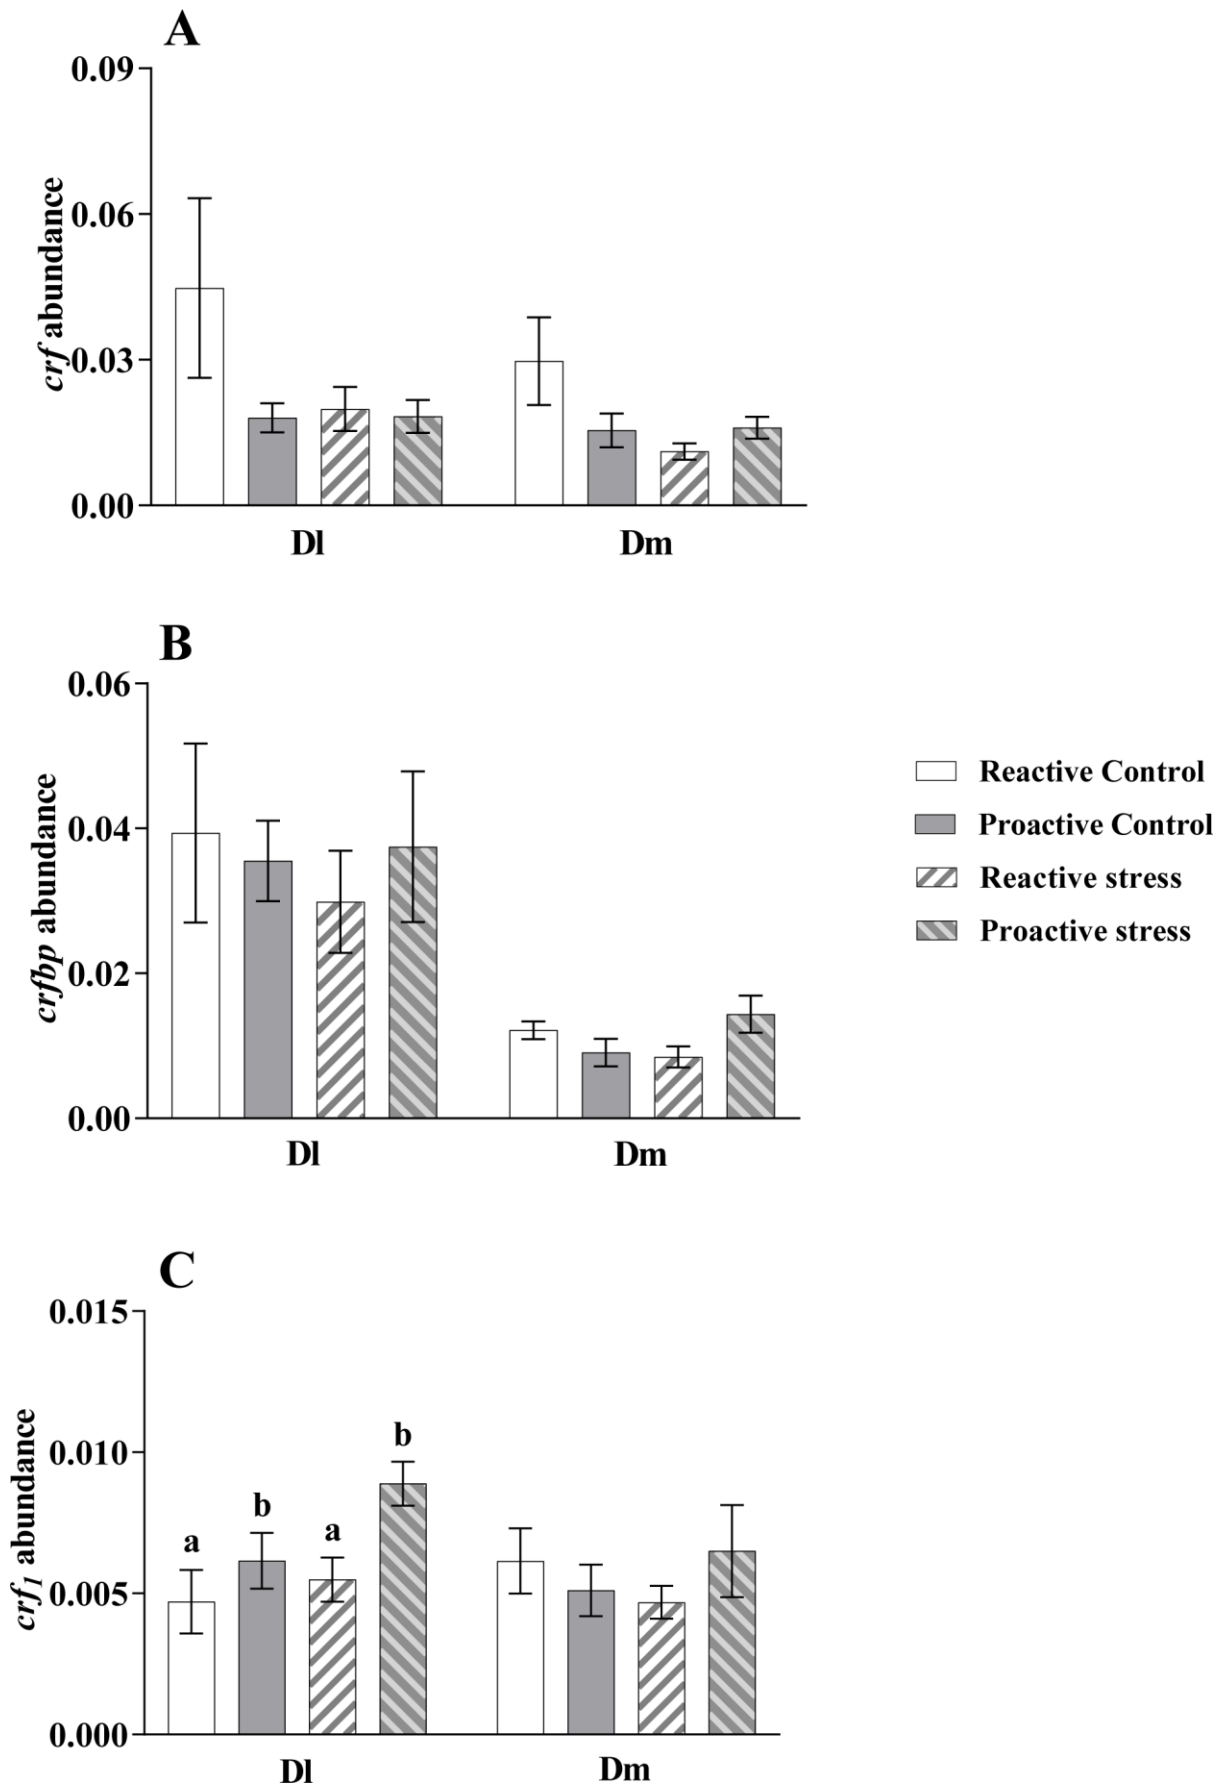

**Fig. 4** Effect of coping style (proactive vs. reactive) and stress (basal vs. acute stress) on the relative mRNA abundance (to the *S20* reference gene) of the corticotropin releasing factor (*crf*, **A**), *crf*-binding protein (*crfbp*, **B**) and the *CRF receptor 1* (*crf1*, **C**) in the dorsolateral pallium (Dl) and the dorsomedial pallium (Dm) of Atlantic salmon. Lower case letters indicate significant ANOVA differences within style and/or stress groups in each telencephalic subregion (*i.e.* not between subregions). Data are presented as mean  $\pm$  SEM.

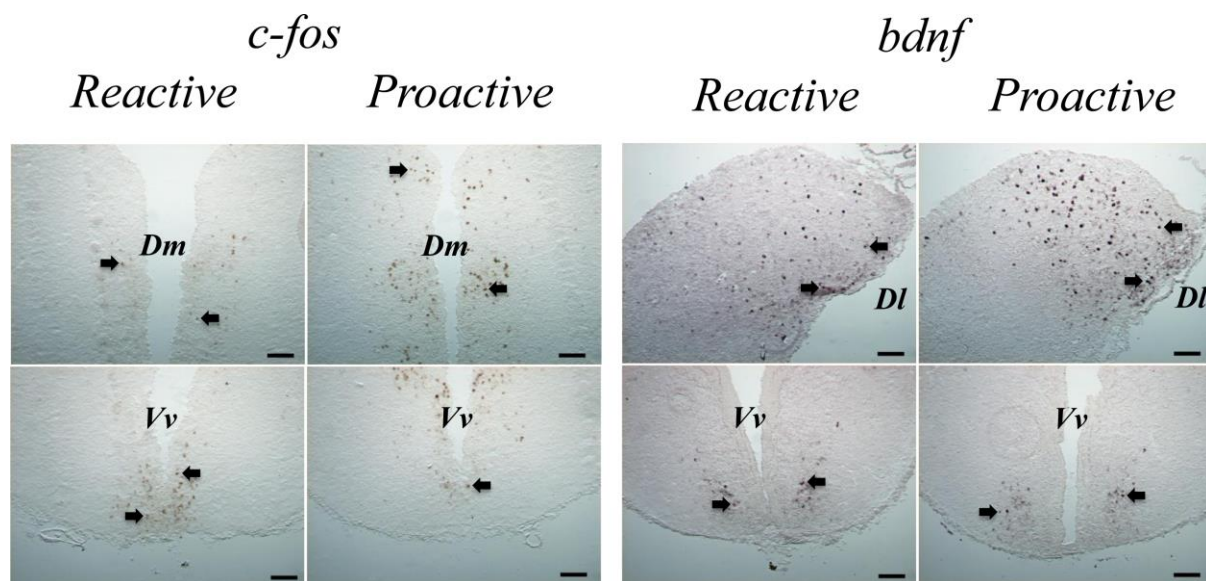

**Fig. 5** *In situ* hybridisation (ISH) of the immediate early gene *c-fos* and *brain derived neurotrophic factor (bdnf)* after an acute stress challenge in the dorsolateral (Dl) and dorsomedial (Dm) pallium as well as in the ventral part of the ventral telencephalon (Vv) of proactive and reactive fish. Arrows in pictures indicate stained cells. The scale bars represent 100  $\mu\text{m}$ .

**Supplementary Table 1** Primer sequences for target genes

| Gene                      | Primer Sequence 5' → 3'                                         | Accession nr.                      | Reference                                                                                                                                                                                                         |
|---------------------------|-----------------------------------------------------------------|------------------------------------|-------------------------------------------------------------------------------------------------------------------------------------------------------------------------------------------------------------------|
| <i>eflaa</i>              | Fw CCCCTCCAGGACGTTTACAAA<br>Rev CACACGGCCCACAGGTACA             | BT059133.1                         | Ingerslev et al. (2006). Expression profiling and validation of reference gene candidates in immune relevant tissues and cells from Atlantic salmon ( <i>Salmo salar</i> L.). <i>Molec Immunol</i> 43, 1194-1201. |
| <i>S20</i>                | Fwd GCAGACCTTATCCGTGGAGCTA<br>Rev TGGTGATGCGCAGAGTCTTG          | NM_001140843.1                     | Olsvik et al. (2005). Evaluation of potential reference genes in real-time RT-PCR studies of Atlantic salmon. <i>BMC Molec Biol</i> 6, 21                                                                         |
| <i>hprt1</i>              | Fwd CGTGGCTCTCTGCGTGCTCA<br>Rev TGGAGCGGTCGCTGTTACGG            | BT043501.1                         | Andreassen et al. (2009). Characterization of full-length sequenced cDNA inserts (FLiCs) from Atlantic salmon ( <i>Salmo salar</i> ). <i>BMC Genomics</i> 10, 502.                                                |
| <i>bdnf</i>               | Fwd ATGTCTGGGCAGACCGTTAC<br>Rev GTTGTCTGCATTGGGAGTT             | GU108576.1                         | Vindas et al. (2014). Coping with unpredictability: Dopaminergic and neurotrophic responses to omission of expected reward in Atlantic salmon ( <i>Salmo salar</i> L.). <i>PLoS ONE</i> 9, e85543.                |
| <i>pcna</i>               | Fwd TGAGCTCGTCGGGTATCTCT<br>Rev CTCGAAGACTAGGGCGAGTG            | BT056931.1                         | Vindas et al. (2014). Coping with unpredictability: Dopaminergic and neurotrophic responses to omission of expected reward in Atlantic salmon ( <i>Salmo salar</i> L.). <i>PLoS ONE</i> 9, e85543.                |
| <i>neurod</i>             | Fwd CAATGGACAGCTCCCACATCT<br>Rev CCAGCGCACTTCCGTATGA            | BT058820.1                         | Leong et al. (2010). <i>Salmo salar</i> and <i>Esox lucius</i> full-length cDNA sequences reveal changes in evolutionary pressures on a post-tetraploidization genome. <i>BMC Genomics</i> 11, 279-279.           |
| <i>5-HT<sub>1Aα</sub></i> | Fwd ATGCTGGTCCCTCTACGGGCG<br>Rev CGTGGTTCACCGCGCCGTTT           | AGKD01067361.1<br>: 7182-7844*     | Thörnqvist et al. (2015). Natural selection constrains personality and brain gene expression differences in Atlantic salmon ( <i>Salmo salar</i> ). <i>J Exp Biol</i> 218, 1077-1083.                             |
| <i>5-HT<sub>1Aβ</sub></i> | Fwd TTGATCATGCGTTCAGCCGA<br>Rev AAAGGAATGTAGAACGCGCCGA          | DY694524                           | Thörnqvist et al. (2015). Natural selection constrains personality and brain gene expression differences in Atlantic salmon ( <i>Salmo salar</i> ). <i>J Exp Biol</i> 218, 1077-1083.                             |
| <i>5HTTA</i>              | Fwd ACAAACCACTCCCTCCTCCT<br>Rev CGGCTACATGGCTGAAATGC            | AGKD03016701.1<br>: 3425-5030*     | Thörnqvist, <i>et al.</i> unpublished                                                                                                                                                                             |
| <i>5HTTB</i>              | Fwd TCATGGCCATCTTTGGAGGG<br>Rev TTGTCACAGTTGGTCCAGGG            | AGKD03016179.1<br>: 111470-112049* | Thörnqvist, <i>et al.</i> unpublished                                                                                                                                                                             |
| <i>crf</i>                | Fwd AACCAGCTCGACGACTCGATGG<br>Rev GCTATGGGCTTGTGCTGTAAGT        | BT057824                           | Leong et al. (2010). <i>Salmo salar</i> and <i>Esox lucius</i> full-length cDNA sequences reveal changes in evolutionary pressures on a post-tetraploidization genome. <i>BMC Genomics</i> 11, 279-279.           |
| <i>crfbp</i>              | Fwd TGAGCCAACCAGGTCATCAATGT<br>Rev TCCCTTCATACCCAGCCATCAAA      | BT059529                           | Leong et al. (2010). <i>Salmo salar</i> and <i>Esox lucius</i> full-length cDNA sequences reveal changes in evolutionary pressures on a post-tetraploidization genome. <i>BMC Genomics</i> 11, 279-279.           |
| <i>crf<sub>1</sub></i>    | Fwd TGACCATCTGGGCTGTTGTGATCT<br>Rev TAAGATTGGTGGACAGCAGGAGCA    | -----                              | Nilson et al., unpublished                                                                                                                                                                                        |
| <i>crf<sub>2</sub></i>    | Fwd ACCATGGATGCTACGATTTACCA<br>Rev CTGTCTTGAAATGAATCCATCACACTGC | -----                              | Nilson et al., unpublished                                                                                                                                                                                        |

**Supplementary Table 2** Mean ( $\pm$  SEM) relative transcript abundance of target genes (to the reference gene *S20*), serotonin (5-HT) and dopamine (DA) neurochemistry, as well as plasma cortisol in reactive and proactive fish at basal and acute stress conditions in dorsolateral pallium (DI), dorsomedial pallium (Dm) and ventral part of the ventral telencephalon (Vv). Two-Way ANOVA statistics for effect of coping style, stress and the interaction between style and stress (if it was maintained in the model which was indicated by "lack of fit" analysis), are given for each variable.

|                                             | Reactive                 |                         | Proactive                |                        | Style                                   | ANOVA                                   |                                         |
|---------------------------------------------|--------------------------|-------------------------|--------------------------|------------------------|-----------------------------------------|-----------------------------------------|-----------------------------------------|
|                                             | Control ( <i>n</i> = 10) | Stress ( <i>n</i> = 14) | Control ( <i>n</i> = 12) | Stress ( <i>n</i> = 8) |                                         | Stress                                  | Interaction                             |
| <b>DI</b>                                   |                          |                         |                          |                        |                                         |                                         |                                         |
| <i>pcna</i>                                 | 0.27 $\pm$ 0.12          | 0.08 $\pm$ 0.02         | 0.07 $\pm$ 0.02          | 0.15 $\pm$ 0.05        | $F_{(3,26)} = 1.71, p = 0.2$            | $F_{(3,26)} = 1.05, p = 0.31$           | $F_{(3,26)} = 8.04, p = \mathbf{0.009}$ |
| <i>bdnf</i>                                 | 0.17 $\pm$ 0.04          | 0.17 $\pm$ 0.02         | 0.17 $\pm$ 0.03          | 0.38 $\pm$ 0.08        | $F_{(3,35)} = 4.02, p = \mathbf{0.05}$  | $F_{(3,35)} = 6.2, p = \mathbf{0.02}$   | $F_{(3,35)} = 4.62, p = \mathbf{0.04}$  |
| <i>neurod</i>                               | 0.06 $\pm$ 0.03          | 0.03 $\pm$ 0.005        | 0.04 $\pm$ 0.008         | 0.05 $\pm$ 0.01        | $F_{(2,24)} = 1.47, p = 0.24$           | $F_{(2,24)} = 0.13, p = 0.72$           | -----                                   |
| <i>5-HT<sub>1A<math>\alpha</math></sub></i> | 0.01 $\pm$ 0.004         | 0.03 $\pm$ 0.01         | 0.02 $\pm$ 0.001         | 0.02 $\pm$ 0.005       | $F_{(2,27)} = 0.02, p = 0.88$           | $F_{(2,27)} = 3.3, p = 0.08$            | -----                                   |
| <i>5-HT<sub>1A<math>\beta</math></sub></i>  | 0.02 $\pm$ 0.004         | 0.01 $\pm$ 0.001        | 0.02 $\pm$ 0.008         | 0.01 $\pm$ 0.006       | $F_{(2,13)} = 0.02, p = 0.89$           | $F_{(2,13)} = 1.56, p = 0.23$           | -----                                   |
| <i>5-HTTA</i>                               | -----                    | 0.006 $\pm$ 0.001       | 0.005 $\pm$ 0.001        | 0.004 $\pm$ 0.001      | -----                                   | -----                                   | -----                                   |
| <i>5-HTTB</i>                               | -----                    | -----                   | -----                    | -----                  | -----                                   | -----                                   | -----                                   |
| <i>crf</i>                                  | 0.04 $\pm$ 0.02          | 0.02 $\pm$ 0.003        | 0.02 $\pm$ 0.004         | 0.02 $\pm$ 0.003       | $F_{(2,31)} = 1.47, p = 0.24$           | $F_{(2,31)} = 1.79, p = 0.19$           | -----                                   |
| <i>crfbp</i>                                | 0.04 $\pm$ 0.01          | 0.03 $\pm$ 0.005        | 0.03 $\pm$ 0.007         | 0.04 $\pm$ 0.01        | $F_{(2,29)} = 0.12, p = 0.73$           | $F_{(2,29)} = 0.35, p = 0.55$           | -----                                   |
| <i>crf<sub>1</sub></i>                      | 0.005 $\pm$ 0.001        | 0.006 $\pm$ 0.001       | 0.005 $\pm$ 0.001        | 0.009 $\pm$ 0.001      | $F_{(2,26)} = 6.55, p = \mathbf{0.02}$  | $F_{(2,26)} = 4.25, p = 0.05$           | -----                                   |
| <i>crf<sub>2</sub></i>                      | -----                    | 0.009 $\pm$ 0.002       | 0.02 $\pm$ 0.006         | 0.01 $\pm$ 0.002       | -----                                   | -----                                   | -----                                   |
| <i>5-HT</i>                                 | 125 $\pm$ 11             | 131 $\pm$ 11            | 125 $\pm$ 11             | 105 $\pm$ 6            | $F_{(2,40)} = 1.41, p = 0.24$           | $F_{(2,40)} = 0.31, p = 0.58$           | -----                                   |
| <i>5-HIAA</i>                               | 26 $\pm$ 4               | 42 $\pm$ 4              | 22 $\pm$ 2               | 31 $\pm$ 3             | $F_{(2,40)} = 4.16, p = 0.05$           | $F_{(2,40)} = 14.9, p < \mathbf{0.001}$ | -----                                   |
| <i>DA</i>                                   | 92 $\pm$ 11              | 82 $\pm$ 12             | 72 $\pm$ 12              | 48 $\pm$ 10            | $F_{(2,39)} = 5.98, p = \mathbf{0.02}$  | $F_{(2,39)} = 2.89, p = 0.1$            | -----                                   |
| <i>DOPAC</i>                                | 10 $\pm$ 1               | 9 $\pm$ 2               | 6 $\pm$ 2                | 5 $\pm$ 1              | $F_{(2,39)} = 8.13, p = \mathbf{0.007}$ | $F_{(2,39)} = 0.27, p = 0.6$            | -----                                   |
| <b>Dm</b>                                   |                          |                         |                          |                        |                                         |                                         |                                         |
| <i>pcna</i>                                 | 0.09 $\pm$ 0.02          | 0.08 $\pm$ 0.01         | 0.08 $\pm$ 0.01          | 0.07 $\pm$ 0.01        | $F_{(2,34)} = 0.12, p = 0.73$           | $F_{(2,34)} = 0.41, p = 0.53$           | -----                                   |
| <i>bdnf</i>                                 | 0.14 $\pm$ 0.03          | 0.1 $\pm$ 0.02          | 0.14 $\pm$ 0.03          | 0.14 $\pm$ 0.02        | $F_{(2,33)} = 0.5, p = 0.48$            | $F_{(2,33)} = 0.99, p = 0.33$           | -----                                   |
| <i>neurod</i>                               | 0.03 $\pm$ 0.01          | 0.02 $\pm$ 0.002        | 0.01 $\pm$ 0.002         | 0.02 $\pm$ 0.006       | $F_{(2,34)} = 1.04, p = 0.31$           | $F_{(2,34)} = 0.35, p = 0.56$           | -----                                   |
| <i>5-HT<sub>1A<math>\alpha</math></sub></i> | 0.01 $\pm$ 0.002         | 0.009 $\pm$ 0.001       | 0.01 $\pm$ 0.002         | 0.02 $\pm$ 0.004       | $F_{(2,34)} = 5.78, p = \mathbf{0.02}$  | $F_{(2,34)} = 0.03, p = 0.86$           | -----                                   |
| <i>5-HT<sub>1A<math>\beta</math></sub></i>  | 0.003 $\pm$ 0.0004       | 0.004 $\pm$ 0.0005      | 0.005 $\pm$ 0.001        | 0.008 $\pm$ 0.001      | $F_{(2,22)} = 13.7, p = \mathbf{0.001}$ | $F_{(2,22)} = 4.3, p = 0.05$            | -----                                   |
| <i>5-HTTA</i>                               | 0.004 $\pm$ 0.001        | 0.003 $\pm$ 0.001       | 0.004 $\pm$ 0.0001       | 0.004 $\pm$ 0.001      | $F_{(2,13)} = 0.62, p = 0.44$           | $F_{(2,13)} = 0.1, p = 0.76$            | -----                                   |
| <i>5-HTTB</i>                               | -----                    | -----                   | -----                    | -----                  | -----                                   | -----                                   | -----                                   |
| <i>crf</i>                                  | 0.03 $\pm$ 0.01          | 0.01 $\pm$ 0.003        | 0.01 $\pm$ 0.002         | 0.02 $\pm$ 0.002       | $F_{(2,30)} = 0.52, p = 0.48$           | $F_{(2,30)} = 3.19, p = 0.08$           | -----                                   |
| <i>crfbp</i>                                | 0.01 $\pm$ 0.001         | 0.009 $\pm$ 0.002       | 0.008 $\pm$ 0.001        | 0.01 $\pm$ 0.002       | $F_{(3,26)} = 0.39, p = 0.54$           | $F_{(3,26)} = 0.05, p = 0.83$           | $F_{(3,26)} = 6.16, p = \mathbf{0.02}$  |
| <i>crf<sub>1</sub></i>                      | 0.006 $\pm$ 0.001        | 0.005 $\pm$ 0.001       | 0.005 $\pm$ 0.001        | 0.006 $\pm$ 0.002      | $F_{(2,37)} = 0.05, p = 0.83$           | $F_{(2,37)} = 0.04, p = 0.83$           | -----                                   |
| <i>crf<sub>2</sub></i>                      | -----                    | -----                   | -----                    | -----                  | -----                                   | -----                                   | -----                                   |
| <i>5-HT</i>                                 | 208 $\pm$ 4              | 174 $\pm$ 6             | 163 $\pm$ 8              | 205 $\pm$ 17           | $F_{(2,37)} = 0.01, p = 0.92$           | $F_{(2,37)} = 0.4, p = 0.53$            | -----                                   |
| <i>5-HIAA</i>                               | 22 $\pm$ 4               | 23 $\pm$ 2              | 18 $\pm$ 2               | 33 $\pm$ 4             | $F_{(3,39)} = 0.9, p = 0.35$            | $F_{(3,39)} = 7.2, p = \mathbf{0.01}$   | $F_{(3,39)} = 5.15, p = \mathbf{0.03}$  |
| <i>DA</i>                                   | 76 $\pm$ 24              | 65 $\pm$ 12             | 36 $\pm$ 5               | 49 $\pm$ 10            | $F_{(2,37)} = 1.44, p = 0.24$           | $F_{(2,37)} = 0.16, p = 0.69$           | -----                                   |



|                           |               |                |              |              |                                        |                                         |                                          |
|---------------------------|---------------|----------------|--------------|--------------|----------------------------------------|-----------------------------------------|------------------------------------------|
| <b>DOPAC</b>              | 10 ± 3        | 9 ± 2          | 8 ± 2        | 4 ± 1        | $F_{(2,35)} = 1.69, p = 0.2$           | $F_{(2,35)} = 1.41, p = 0.24$           | -----                                    |
| <b>Vv</b>                 |               |                |              |              |                                        |                                         |                                          |
| <i>pcna</i>               | 0.17 ± 0.07   | 0.06 ± 0.02    | 0.17 ± 0.04  | 0.09 ± 0.02  | $F_{(2,24)} = 0.33, p = 0.57$          | $F_{(2,24)} = 5.45, p = \mathbf{0.03}$  | -----                                    |
| <i>bdnf</i>               | 0.16 ± 0.05   | 0.05 ± 0.01    | 0.07 ± 0.02  | 0.39 ± 0.14  | $F_{(3,23)} = 3.22, p = 0.09$          | $F_{(3,23)} = 1.59, p = 0.22$           | $F_{(3,23)} = 11.69, p = \mathbf{0.002}$ |
| <i>neurod</i>             | 0.26 ± 0.25   | 0.04 ± 0.01    | 0.02 ± 0.005 | 0.03 ± 0.009 | $F_{(2,12)} = 0.43, p = 0.53$          | $F_{(2,12)} = 3.9, p = 0.07$            | -----                                    |
| <i>5-HT<sub>1Aα</sub></i> | 0.02 ± 0.008  | 0.02 ± 0.002   | 0.04 ± 0.01  | 0.03 ± 0.004 | $F_{(2,24)} = 2.75, p = 0.11$          | $F_{(2,24)} = 0.33, p = 0.57$           | -----                                    |
| <i>5-HT<sub>1Aβ</sub></i> | 0.01 ± 0.002  | 0.008 ± 0.0006 | 0.02 ± 0.006 | 0.01 ± 0.005 | $F_{(2,19)} = 4.84, p = \mathbf{0.04}$ | $F_{(2,19)} = 1.32, p = 0.26$           | -----                                    |
| <i>5-HTT<sub>A</sub></i>  | 0.006 ± 0.001 | 0.003 ± 0.0004 | 0.01 ± 0.005 | -----        | -----                                  | -----                                   | -----                                    |
| <i>5-HTT<sub>B</sub></i>  | -----         | -----          | -----        | -----        | -----                                  | -----                                   | -----                                    |
| <i>crf</i>                | -----         | -----          | -----        | -----        | -----                                  | -----                                   | -----                                    |
| <i>crfbp</i>              | -----         | -----          | -----        | -----        | -----                                  | -----                                   | -----                                    |
| <i>crf<sub>1</sub></i>    | -----         | -----          | -----        | -----        | -----                                  | -----                                   | -----                                    |
| <i>crf<sub>2</sub></i>    | -----         | -----          | -----        | -----        | -----                                  | -----                                   | -----                                    |
| <i>5-HT</i>               | -----         | -----          | -----        | -----        | -----                                  | -----                                   | -----                                    |
| <i>5-HIAA</i>             | -----         | -----          | -----        | -----        | -----                                  | -----                                   | -----                                    |
| DA                        | 577 ± 69      | 462 ± 26       | 545 ± 72     | 503 ± 87     | $F_{(2,33)} = 0.01, p = 0.93$          | $F_{(2,33)} = 1.65, p = 0.21$           | -----                                    |
| DOPAC                     | 34 ± 12       | 22 ± 2         | 36 ± 7       | 29 ± 9       | $F_{(2,28)} = 0.01, p = 0.97$          | $F_{(2,28)} = 0.57, p = 0.46$           | -----                                    |
| <b>Plasma</b>             |               |                |              |              |                                        |                                         |                                          |
| Cortisol                  | 5 ± 1         | 150 ± 24       | 6 ± 2        | 96 ± 17      | $F_{(3,108)} = 14, p < \mathbf{0.001}$ | $F_{(3,108)} = 143, p < \mathbf{0.001}$ | $F_{(3,108)} = 9.36, p = \mathbf{0.002}$ |

**Supplementary Table 3** Mean ( $\pm$  SD) Cq values and efficiencies for target genes in reactive and proactive fish at basal and acute stress conditions in dorsolateral pallium (DI), dorsomedial pallium (Dm) and ventral part of the central telencephalon (Vv). The total number of individuals per group is depicted as N, while *n* indicates the number of individuals with a Cq  $\leq$  34.5 per target gene.

|                                             | Efficiency       | Control        | Reactive<br>N = 10 | Stress         | N = 14        | Control        | Proactive<br>N = 12 | Stress         | N = 8        |
|---------------------------------------------|------------------|----------------|--------------------|----------------|---------------|----------------|---------------------|----------------|--------------|
| <b>DI</b>                                   |                  |                |                    |                |               |                |                     |                |              |
| <i>pcna</i>                                 | 1.84 $\pm$ 0.02  | 29.6 $\pm$ 1.8 | <i>n</i> = 6       | 30.5 $\pm$ 1.8 | <i>n</i> = 10 | 30.3 $\pm$ 2.2 | <i>n</i> = 11       | 29.3 $\pm$ 2   | <i>n</i> = 8 |
| <i>bdnf</i>                                 | 1.87 $\pm$ 0.004 | 30 $\pm$ 2     | <i>n</i> = 9       | 28.4 $\pm$ 1.6 | <i>n</i> = 14 | 28.6 $\pm$ 2   | <i>n</i> = 12       | 28.1 $\pm$ 2.3 | <i>n</i> = 8 |
| <i>neurod</i>                               | 1.81 $\pm$ 0.01  | 30.6 $\pm$ 3.1 | <i>n</i> = 3       | 32.3 $\pm$ 2   | <i>n</i> = 11 | 30.4 $\pm$ 3.4 | <i>n</i> = 10       | 31.9 $\pm$ 1.4 | <i>n</i> = 7 |
| <i>5-HT<sub>1A<math>\alpha</math></sub></i> | 1.86 $\pm$ 0.01  | 32.2 $\pm$ 2.4 | <i>n</i> = 6       | 31.3 $\pm$ 1.2 | <i>n</i> = 10 | 31.9 $\pm$ 1   | <i>n</i> = 12       | 31.4 $\pm$ 0.2 | <i>n</i> = 6 |
| <i>5-HT<sub>1A<math>\beta</math></sub></i>  | 1.83 $\pm$ 0.004 | 33.7 $\pm$ 0.6 | <i>n</i> = 3       | 33.2 $\pm$ 0.7 | <i>n</i> = 5  | 32.9 $\pm$ 0.5 | <i>n</i> = 4        | 33.5 $\pm$ 0.7 | <i>n</i> = 4 |
| <i>5-HTTA</i>                               | 1.86 $\pm$ 0.02  | ----           | ----               | 33.2 $\pm$ 0.8 | <i>n</i> = 4  | 33.7 $\pm$ 0.6 | <i>n</i> = 6        | 33.2 $\pm$ 0.6 | <i>n</i> = 2 |
| <i>5-HTTB</i>                               | 1.81 $\pm$ 0.03  | 25.2 $\pm$ 0.4 | <i>n</i> = 2       | ----           | ----          | ----           | ----                | ----           | ----         |
| <i>crf</i>                                  | 1.89 $\pm$ 0.003 | 32.1 $\pm$ 1.8 | <i>n</i> = 7       | 31.9 $\pm$ 1.4 | <i>n</i> = 13 | 31.2 $\pm$ 1.3 | <i>n</i> = 11       | 31 $\pm$ 1.1   | <i>n</i> = 7 |
| <i>crf<sub>bp</sub></i>                     | 1.84 $\pm$ 0.004 | 33.2 $\pm$ 1.5 | <i>n</i> = 7       | 31.9 $\pm$ 1.6 | <i>n</i> = 11 | 31.3 $\pm$ 1.5 | <i>n</i> = 12       | 32.5 $\pm$ 2.9 | <i>n</i> = 7 |
| <i>crf<sub>1</sub></i>                      | 1.88 $\pm$ 0.02  | 33.7 $\pm$ 0.9 | <i>n</i> = 4       | 33.2 $\pm$ 0.6 | <i>n</i> = 9  | 32.8 $\pm$ 0.9 | <i>n</i> = 10       | 32.7 $\pm$ 1   | <i>n</i> = 8 |
| <i>crf<sub>2</sub></i>                      | 1.8 $\pm$ 0.006  | ----           | ----               | 33.7 $\pm$ 0.7 | <i>n</i> = 3  | 33.7 $\pm$ 0.5 | <i>n</i> = 3        | 33.6 $\pm$ 0.9 | <i>n</i> = 2 |
| <b>Dm</b>                                   |                  |                |                    |                |               |                |                     |                |              |
| <i>pcna</i>                                 | 1.85 $\pm$ 0.009 | 28.7 $\pm$ 1.3 | <i>n</i> = 10      | 28.6 $\pm$ 1.3 | <i>n</i> = 14 | 28.9 $\pm$ 1.2 | <i>n</i> = 11       | 29.3 $\pm$ 1.9 | <i>n</i> = 7 |
| <i>bdnf</i>                                 | 1.88 $\pm$ 0.007 | 27.6 $\pm$ 1.4 | <i>n</i> = 10      | 27.1 $\pm$ 1.3 | <i>n</i> = 14 | 27.1 $\pm$ 2   | <i>n</i> = 11       | 27.3 $\pm$ 1.9 | <i>n</i> = 8 |
| <i>neurod</i>                               | 1.82 $\pm$ 0.001 | 32.7 $\pm$ 1.4 | <i>n</i> = 9       | 32.6 $\pm$ 1   | <i>n</i> = 12 | 32.4 $\pm$ 1.6 | <i>n</i> = 10       | 32.9 $\pm$ 1   | <i>n</i> = 7 |
| <i>5-HT<sub>1A<math>\alpha</math></sub></i> | 1.88 $\pm$ 0.009 | 31.4 $\pm$ 0.8 | <i>n</i> = 10      | 31 $\pm$ 0.6   | <i>n</i> = 14 | 31 $\pm$ 1     | <i>n</i> = 11       | 30.8 $\pm$ 0.9 | <i>n</i> = 7 |
| <i>5-HT<sub>1A<math>\beta</math></sub></i>  | 1.84 $\pm$ 0.003 | 33.4 $\pm$ 0.8 | <i>n</i> = 4       | 32.8 $\pm$ 0.8 | <i>n</i> = 10 | 33.4 $\pm$ 0.9 | <i>n</i> = 6        | 32.8 $\pm$ 1.2 | <i>n</i> = 6 |
| <i>5-HTTA</i>                               | 1.87 $\pm$ 0.02  | 33.6 $\pm$ 0.5 | <i>n</i> = 4       | 33.4 $\pm$ 0.7 | <i>n</i> = 5  | 32.7 $\pm$ 0.5 | <i>n</i> = 3        | 33.1 $\pm$ 1   | <i>n</i> = 4 |
| <i>5-HTTB</i>                               | 1.82 $\pm$ 0.04  | ----           | ----               | 28.9 $\pm$ 6.5 | <i>n</i> = 2  | ----           | ----                | ----           | ----         |
| <i>crf</i>                                  | 1.89 $\pm$ 0.003 | 31 $\pm$ 1.4   | <i>n</i> = 9       | 31 $\pm$ 1.5   | <i>n</i> = 13 | 31.1 $\pm$ 1.4 | <i>n</i> = 10       | 30.5 $\pm$ 1.1 | <i>n</i> = 6 |
| <i>crf<sub>bp</sub></i>                     | 1.83 $\pm$ 0.008 | 32.7 $\pm$ 0.9 | <i>n</i> = 7       | 33.1 $\pm$ 0.9 | <i>n</i> = 12 | 32.7 $\pm$ 1.2 | <i>n</i> = 8        | 32.7 $\pm$ 0.8 | <i>n</i> = 6 |
| <i>crf<sub>1</sub></i>                      | 1.89 $\pm$ 0.01  | 32.5 $\pm$ 0.7 | <i>n</i> = 10      | 32.6 $\pm$ 0.7 | <i>n</i> = 14 | 32.4 $\pm$ 0.8 | <i>n</i> = 10       | 32.7 $\pm$ 0.6 | <i>n</i> = 7 |
| <i>crf<sub>2</sub></i>                      | 1.77 $\pm$ 0.004 | ----           | ----               | ----           | ----          | ----           | ----                | ----           | ----         |
| <b>Vv</b>                                   |                  |                |                    |                |               |                |                     |                |              |
| <i>pcna</i>                                 | 1.84 $\pm$ 0.02  | 29.4 $\pm$ 2.3 | <i>n</i> = 6       | 30 $\pm$ 2.4   | <i>n</i> = 10 | 30.1 $\pm$ 1.5 | <i>n</i> = 9        | 30.8 $\pm$ 2.6 | <i>n</i> = 6 |
| <i>bdnf</i>                                 | 1.87 $\pm$ 0.01  | 29.4 $\pm$ 3.1 | <i>n</i> = 7       | 30.3 $\pm$ 2.2 | <i>n</i> = 12 | 29.2 $\pm$ 2.2 | <i>n</i> = 8        | 30.3 $\pm$ 2.4 | <i>n</i> = 7 |
| <i>neurod</i>                               | 1.83 $\pm$ 0.02  | 33.2 $\pm$ 0.7 | <i>n</i> = 6       | 32.1 $\pm$ 1.3 | <i>n</i> = 7  | 32.7 $\pm$ 1.3 | <i>n</i> = 8        | 33.8 $\pm$ 0.4 | <i>n</i> = 6 |
| <i>5-HT<sub>1A<math>\alpha</math></sub></i> | 1.86 $\pm$ 0.02  | 32.2 $\pm$ 1.8 | <i>n</i> = 6       | 31.8 $\pm$ 1.7 | <i>n</i> = 10 | 31.3 $\pm$ 1.9 | <i>n</i> = 8        | 32.1 $\pm$ 2   | <i>n</i> = 5 |
| <i>5-HT<sub>1A<math>\beta</math></sub></i>  | 1.83 $\pm$ 0.03  | 33.2 $\pm$ 0.8 | <i>n</i> = 7       | 32.9 $\pm$ 1.3 | <i>n</i> = 8  | 33 $\pm$ 1     | <i>n</i> = 7        | 33.2 $\pm$ 1.1 | <i>n</i> = 3 |
| <i>5-HTTA</i>                               | 1.86 $\pm$ 0.03  | 33.2 $\pm$ 0.6 | <i>n</i> = 2       | 33.9 $\pm$ 0.7 | <i>n</i> = 2  | 33.9 $\pm$ 0.5 | <i>n</i> = 3        | ----           | ----         |
| <i>5-HTTB</i>                               | 1.84 $\pm$ 0.01  | ----           | ----               | ----           | ----          | ----           | ----                | ----           | ----         |
| <i>crf</i>                                  | 1.84 $\pm$ 0.01  | 32.5 $\pm$ 0.5 | <i>n</i> = 3       | 33 $\pm$ 0.5   | <i>n</i> = 7  | 32.7 $\pm$ 0.6 | <i>n</i> = 5        | 32.9 $\pm$ 0.4 | <i>n</i> = 2 |

|              |                 |                |         |                 |         |                |         |                |         |
|--------------|-----------------|----------------|---------|-----------------|---------|----------------|---------|----------------|---------|
| <i>crfbp</i> | $1.85 \pm 0.02$ | $32.9 \pm 0.9$ | $n = 3$ | $33.3 \pm 0.3$  | $n = 4$ | $31.8 \pm 0.5$ | $n = 4$ | ----           | ----    |
| <i>crf1</i>  | $1.87 \pm 0.02$ | $33 \pm 0.5$   | $n = 3$ | $33 \pm 0.3$    | $n = 5$ | $33.6 \pm 0.2$ | $n = 4$ | $32.9 \pm 0.2$ | $n = 2$ |
| <i>crf2</i>  | $1.79 \pm 0.01$ | ----           | ----    | $34.3 \pm 0.04$ | $n = 2$ | $34.4 \pm 0.1$ | $n = 2$ | ----           | ----    |

## Supplementary Data file

[Click here to Download Data file](#)
